# Supplementary material for: Challenges in Petroleum Characterization—A Review
Source: MDPI journal article supplement (doi:10.3390/en15207765), 2022-10-20
Supplement: s1 [file s1]

## Supplementary Materials

*Review*

# Challenges in Petroleum Characterization — A Review

**Ivelina Shishkova <sup>1</sup>, Dicho Stratiev <sup>1,2,\*</sup>, Iliyan Venkov Kolev <sup>1</sup>, Svetoslav Nenov <sup>3</sup>, Dimitar Nedanovski <sup>4</sup>,  
Krassimir Atanassov <sup>2</sup>, Vitaly Ivanov <sup>5</sup> and Simeon Ribagin <sup>2</sup>**

<sup>1</sup> LUKOIL Neftohim Burgas, 8104 Burgas, Bulgaria

<sup>2</sup> Institute of Biophysics and Biomedical Engineering, Bulgarian Academy of Sciences, Academic Georgi Bonchev 105, 1113 Sofia, Bulgaria

<sup>3</sup> Department of Mathematics, University of Chemical Technology and Metallurgy, Kliment Ohridski 8, 1756 Sofia, Bulgaria

<sup>4</sup> Faculty of Mathematics and Informatics, “St. Kliment Ohridski” University, 15 Tsar Osvoboditel Blvd., 1504 Sofia, Bulgaria

<sup>5</sup> Department of Industrial Technologies and management University Prof. Dr. Assen Zlatarov, Professor Yakimov 1, 8010 Burgas, Bulgaria

\* Correspondence: stratiev.dicho@neftochim.bg

**Table S1. Comprehensive assay of extra light, light, medium, heavy, and heavy-extra heavy crude oils from all over the world**

| Petroleum                             | Badak     | Gippsland | Seria  | Sirtica | Brent Blend | Cinta     | Isthmus | West Texas Sour | Rostam  | REBCO  | Alaskan North Slope | Wilmington | Eocene | Bachaquero | Hondo Monterey | Boscan    |
|---------------------------------------|-----------|-----------|--------|---------|-------------|-----------|---------|-----------------|---------|--------|---------------------|------------|--------|------------|----------------|-----------|
| Origin                                | Indonesia | Australia | Brunei | Libia   | EU          | Indonesia | Mexico  | USA             | Nigeria | Russia | USA                 | USA        | Kuwait | Venezuela  | USA            | Venezuela |
| Petroleum physico-chemical properties |           |           |        |         |             |           |         |                 |         |        |                     |            |        |            |                |           |
| SG                                    | 0,782     | 0,793     | 0,823  | 0,819   | 0,833       | 0,858     | 0,859   | 0,854           | 0,845   | 0,867  | 0,890               | 0,943      | 0,943  | 0,954      | 0,938          | 0,999     |
| S, wt%                                | 0,03      | 0,09      | 0,06   | 0,45    | 0,40        | 0,08      | 1,49    | 1,64            | 1,55    | 1,53   | 1,11                | 1,59       | 4,55   | 2,40       | 4,70           | 5,5       |
| N, wt%                                | ND        | 0,0092    | 0,0162 | ND      | 0,11        | 0,0000    | 0,167   | ND              | 0,0700  | ND     | 0,22                | ND         | ND     | 0,354      | 0,6500         | ND        |
| Pour Point, °C                        | -28,9     | 9,0       | 10,0   | -3,9    | -42,2       | 37,8      | -42,2   | -45,6           | -22,8   | -12,2  | -17,8               | -34,4      | -28,9  | -23,3      | -23,3          | 10,00     |
| Vis 37,78 °C                          | 0,9       | 1,8       | 2,1    | 3,0     | 3,9         | 36,4      | 5,9     | 4,6             | 3,3     | 8,3    | 13,4                | 77,0       | 315,0  | 294,0      | 328,0          | 19430     |
| V, ppm wt                             | 0,1       | < 0.5     | 0,7    | 3,7     | 6,0         | ND        | 49,1    | 6,4             | 16,5    | 46,7   | 26,0                | 43,6       | 59,2   | 332,0      | 301,0          | 1200      |
| Ni, ppm wt                            | 0,1       | < 0.5     | 0,9    | 9,4     | 1,0         | ND        | 9,4     | 3,7             | 6,2     | 14,7   | 11,0                | 67,4       | 29,4   | 55,0       | 144,0          | 150       |
| CCR, wt. %                            | 0,2       | 0,3       | 0,2    | 2,5     | 2,1         | 5,9       | 4,3     | 3,3             | 2,8     | 3,9    | 4,5                 | 7,5        | 8,9    | 10,5       | ND             | 14,9      |
| Asph, wt. %                           | 0,0       | 0,1       | ND     | 0,6     | 0,5         | 0,1       | ND      | ND              | 0,7     | ND     | 0,2                 | ND         | 6,3    | ND         | ND             | 12,0      |
| TAN, mg KOH/g                         | 0,1       | 0,1       | 0,2    | ND      | 0,1         | 0,3       | 0,1     | 0,1             | ND      | ND     | 0,1                 | 2,2        | 0,2    | 2,2        | 0,4            | 1,9       |
| Salt (as NaCl), lbs/1000 bbls         | 3,0       | 2,0       | 15,0   | 2,9     | 4,6         | 10,0      | 2,1     | ND              | 1,1     | ND     | 3,0                 | ND         | 7,0    | 6,0        | ND             | 15,0      |
| Petroleum TBP distillation, % wt.     |           |           |        |         |             |           |         |                 |         |        |                     |            |        |            |                |           |
| Gas C3-C4                             | 2,2       | 1,4       | 1,5    | 2,2     | 1,9         | 0,1       | 1,0     | 1,6             | 1,0     | 1,0    | 1,0                 | 0,4        | 0,2    | 0,4        | 0,3            | 0,0       |
| IBP-70°C                              | 20,7      | 9,0       | 3,9    | 7,2     | 6,0         | 2,2       | 3,7     | 4,7             | 5,8     | 4,0    | 2,5                 | 0,7        | 1,1    | 1,0        | 2,6            | 0,0       |
| IBP-100°C                             | 39,7      | 17,5      | 10,8   | 13,4    | 11,4        | 4,0       | 7,8     | 9,5             | 9,9     | 7,4    | 4,8                 | 2,0        | 2,2    | 2,2        | 4,9            | 0,5       |
| IBP-150°C                             | 58,4      | 31,4      | 25,5   | 24,2    | 21,1        | 8,4       | 16,1    | 18,4            | 17,7    | 14,0   | 10,0                | 5,2        | 4,6    | 4,6        | 9,3            | 1,4       |
| IBP-190°C                             | 64,6      | 39,8      | 34,8   | 33,5    | 28,7        | 12,6      | 23,3    | 25,9            | 25,1    | 20,3   | 15,3                | 8,7        | 7,9    | 6,9        | 13,3           | 2,5       |
| IBP-235°C                             | 70,9      | 48,1      | 47,1   | 43,3    | 35,5        | 17,8      | 31,4    | 34,3            | 33,7    | 27,8   | 22,2                | 14,7       | 13,4   | 10,4       | 18,4           | 4,8       |
| IBP-280°C                             | 76,1      | 60,3      | 60,9   | 52,4    | 44,6        | 23,8      | 39,1    | 42,2            | 42,3    | 35,5   | 29,8                | 21,1       | 20,4   | 15,3       | 23,5           | 8,2       |
| IBP-343°C                             | 84,0      | 73,7      | 76,2   | 63,7    | 55,9        | 34,6      | 50,5    | 52,6            | 53,9    | 46,7   | 41,4                | 31,0       | 30,0   | 25,7       | 31,1           | 14,7      |

|                              |                |        |        |        |        |        |        |        |        |        |        |        |        |        |        |        |        |
|------------------------------|----------------|--------|--------|--------|--------|--------|--------|--------|--------|--------|--------|--------|--------|--------|--------|--------|--------|
|                              | IBP-565        | 97,8   | 98,6   | 96,5   | 85,3   | 85,2   | 69,0   | 80,9   | 83,7   | 84,3   | 77,9   | 76,2   | 72,1   | 56,0   | 63,2   | 56,3   | 39,3   |
|                              | 565°C+         | 0,0    | 0,0    | 2,0    | 12,4   | 12,9   | 30,9   | 18,0   | 14,7   | 14,7   | 21,1   | 22,8   | 27,5   | 43,8   | 36,4   | 43,4   | 60,7   |
| Gas composition              |                |        |        |        |        |        |        |        |        |        |        |        |        |        |        |        |        |
|                              | Methane        | 0,0    | 0,0    | 0,0    | 0,0    | 0,0    | 0,0    | 0,0    | 0,0    | 0,0    | 0,0    | 0,0    | 0,0    | 0,0    | 0,0    | 0,0    | 0,0    |
|                              | Ethane         | 0,0    | 0,0    | 0,0    | 0,0    | 0,0    | 0,0    | 0,0    | 0,1    | 0,0    | 0,0    | 0,0    | 0,0    | 0,0    | 0,0    | 0,0    | 0,0    |
|                              | Propane        | 0,2    | 0,2    | 0,3    | 0,3    | 0,4    | 0,0    | 0,2    | 0,3    | 0,2    | 0,2    | 0,1    | 0,1    | 0,0    | 0,1    | 0,1    | 0,0    |
|                              | Isobutane      | 0,6    | 0,3    | 0,3    | 0,5    | 0,3    | 0,0    | 0,2    | 0,4    | 0,2    | 0,2    | 0,2    | 0,1    | 0,0    | 0,1    | 0,1    | 0,0    |
|                              | Normal Butane  | 1,3    | 1,0    | 0,9    | 1,4    | 1,2    | 0,1    | 0,7    | 0,9    | 0,6    | 0,6    | 0,7    | 0,2    | 0,1    | 0,2    | 0,1    | 0,0    |
|                              | Isopentane     | 0,9    | 2,7    | 0,7    | 1,7    | 0,9    | 0,1    | 0,6    | 1,1    | 1,2    | 0,7    | 0,4    | 0,2    | 0,3    | 0,2    | 0,2    | 0,0    |
|                              | n-pentan       | 0,9    | 2,4    | 0,7    | 1,8    | 1,5    | 0,2    | 1,1    | 1,2    | 1,6    | 0,8    | 0,6    | 0,2    | 0,1    | 0,2    | 0,2    | 0,0    |
| Light naphtha fr. 70-100°C   |                |        |        |        |        |        |        |        |        |        |        |        |        |        |        |        |        |
|                              | SG             | 0,753  | 0,726  | 0,723  | 0,712  | 0,719  | 0,705  | 0,701  | 0,717  | 0,710  | 0,703  | 0,728  | 0,727  | 0,702  | 0,733  | 0,729  | 0,719  |
|                              | K <sub>w</sub> | 11,45  | 11,88  | 11,93  | 12,13  | 12,00  | 12,23  | 12,30  | 12,05  | 12,18  | 12,29  | 11,84  | 11,89  | 12,31  | 11,78  | 11,83  | 12,02  |
|                              | S, wt. %       | 0,0008 | 0,0031 | 0,0004 | 0,0179 | 0,0007 | 0,0026 | 0,0386 | 0,1426 | 0,0339 | 0,0126 | 0,0063 | 0,0191 | 0,1270 | 0,0090 | 0,5300 | 0,2450 |
|                              | Naph., %       | 33,4   | 34,4   | 46,1   | 35,0   | 28,6   | 27,1   | 19,6   | 27,1   | 21,7   | 25,2   | 36,8   | 56,2   | 35,0   | 51,9   | 44,6   | 42,1   |
|                              | Aro, %         | 17,4   | 5,1    | 5,5    | 5,3    | 9,6    | 5,0    | 8,6    | 9,0    | 7,6    | 3,7    | 11,1   | 1,3    | 3,1    | 4,7    | 10,0   | 3,0    |
|                              | RON            | 72,5   | 63,3   | 71,3   | 60,4   | 62,5   | 57,3   | 54,9   | 59,3   | 57,6   | 50,9   | 65,9   | 66,0   | 72,6   | 69,3   | 62,5   | 60,4   |
| Medium naphtha fr. 100-150°C |                |        |        |        |        |        |        |        |        |        |        |        |        |        |        |        |        |
|                              | SG             | 0,794  | 0,757  | 0,769  | 0,748  | 0,760  | 0,741  | 0,745  | 0,761  | 0,750  | 0,747  | 0,768  | 0,767  | 0,746  | 0,777  | 0,764  | 0,757  |
|                              | K <sub>w</sub> | 11,23  | 11,80  | 11,62  | 11,97  | 11,77  | 12,05  | 12,00  | 11,77  | 11,93  | 11,99  | 11,65  | 11,67  | 12,03  | 11,52  | 11,69  | 11,83  |
|                              | Sulfur, %      | 0,0011 | 0,0069 | 0,0024 | 0,0312 | 0,0010 | 0,0037 | 0,0536 | 0,2530 | 0,0585 | 0,0306 | 0,0096 | 0,0426 | 0,1798 | 0,0291 | 1,1296 | 0,7556 |
|                              | Naph, %        | 15,2   | 45,5   | 53,1   | 35,0   | 35,0   | 29,6   | 24,0   | 38,8   | 25,8   | 36,6   | 42,2   | 74,7   | 41,8   | 59,4   | 41,2   | 41,5   |
|                              | Aro, %         | 29,2   | 7,3    | 14,5   | 10,4   | 16,0   | 6,7    | 12,9   | 15,8   | 15,0   | 7,8    | 16,3   | 5,0    | 9,1    | 12,8   | 16,1   | 11,2   |
|                              | RON            | 55,9   | 52,2   | 62,1   | 45,5   | 50,0   | 45,6   | 47,1   | 49,5   | 44,5   | 42,2   | 57,2   | 62,1   | 59,3   | 63,9   | 56,5   | 50,8   |
| Heavy naphtha fr. 150-190°C  |                |        |        |        |        |        |        |        |        |        |        |        |        |        |        |        |        |
|                              | SG             | 0,813  | 0,783  | 0,801  | 0,782  | 0,792  | 0,769  | 0,777  | 0,790  | 0,783  | 0,783  | 0,803  | 0,807  | 0,785  | 0,807  | 0,802  | 0,798  |
|                              | K <sub>w</sub> | 11,39  | 11,83  | 11,57  | 11,86  | 11,69  | 12,04  | 11,91  | 11,74  | 11,85  | 11,84  | 11,54  | 11,49  | 11,81  | 11,49  | 11,55  | 11,62  |
|                              | S, wt. %       | 0,0029 | 0,0191 | 0,0085 | 0,0561 | 0,0030 | 0,0094 | 0,0711 | 0,4646 | 0,1277 | 0,0759 | 0,0278 | 0,0954 | 0,2990 | 0,1320 | 2,1000 | 1,4360 |

|                           |                             |        |         |         |        |         |         |         |        |        |        |         |        |        |        |         |        |
|---------------------------|-----------------------------|--------|---------|---------|--------|---------|---------|---------|--------|--------|--------|---------|--------|--------|--------|---------|--------|
|                           | N, wt. %                    | ND     | 0,00002 | 0,00005 | 0,0004 | 0,00025 | 0,00018 | 0,00013 | 0,0006 | 0,0000 | 0,0001 | 0,00028 | 0,0008 | 0,0000 | 0,0004 | 0,00040 | ND     |
|                           | Aniline Point, degrees F    | 92,4   | 135,7   | 113,3   | 138,4  | 125,6   | 137,8   | 133,3   | 126,3  | 120,6  | 130,2  | 117,7   | 115,0  | 124,7  | 117,8  | 107,0   | 112,1  |
|                           | Naph, %                     | 12,5   | 41,6    | 35,0    | 34,9   | 34,9    | 32,3    | 21,6    | 37,9   | 23,6   | 37,7   | 38,9    | 77,3   | 38,6   | 56,3   | 39,3    | 41,4   |
|                           | Aro, %                      | 35,7   | 16,2    | 24,9    | 16,1   | 19,5    | 8,6     | 20,2    | 20,7   | 21,4   | 16,0   | 21,0    | 8,4    | 16,3   | 18,6   | 20,6    | 25,5   |
|                           | RON                         | 24,7   | 30,6    | 48,4    | 30,5   | 34,3    | 32,5    | 30,4    | 35,4   | 29,9   | 35,9   | 47,7    | 58,0   | 45,7   | 58,3   | 49,5    | 51,8   |
| Light kero fr. 190-235°C  |                             |        |         |         |        |         |         |         |        |        |        |         |        |        |        |         |        |
|                           | SG                          | 0,838  | 0,803   | 0,827   | 0,807  | 0,812   | 0,798   | 0,805   | 0,815  | 0,804  | 0,812  | 0,830   | 0,840  | 0,820  | 0,836  | 0,834   | 0,838  |
|                           | K <sub>w</sub>              | 11,38  | 11,90   | 11,55   | 11,85  | 11,75   | 11,98   | 11,87   | 11,73  | 11,90  | 11,78  | 11,52   | 11,38  | 11,67  | 11,44  | 11,45   | 11,42  |
|                           | S, %                        | 0,006  | 0,048   | 0,017   | 0,155  | 0,012   | 0,017   | 0,254   | 0,646  | 0,271  | 0,211  | 0,126   | 0,335  | 0,635  | 0,397  | 2,828   | 2,582  |
|                           | N, %                        | ND     | 0,00008 | 0,00043 | 0,0017 | 0,00116 | 0,00268 | 0,00064 | 0,0019 | 0,0001 | 0,0007 | 0,01145 | 0,0015 | 0,0002 | 0,0026 | 0,00254 | ND     |
|                           | Aniline Point, degrees F    | 111,8  | 144,6   | 126,1   | 146,9  | 138,8   | 155,0   | 139,3   | 134,4  | 135,7  | 136,0  | 128,6   | 119,0  | 130,7  | 124,6  | 115,5   | 113,3  |
|                           | Aromatics, LV pct.          | 37,0   | 14,0    | 26,3    | 16,9   | 22,0    | 10,4    | 21,3    | 21,8   | 24,9   | 21,8   | 24,5    | 15,1   | 24,9   | 20,4   | 23,0    | 26,0   |
|                           | Smoke Point, mm             | 12,3   | 23,1    | 18,7    | 25,8   | 19,8    | 26,2    | 25,5    | 20,2   | 19,5   | 21,7   | 18,4    | 16,2   | 19,0   | 17,1   | 20,0    | 23,0   |
|                           | Cetane Index                | 34,5   | 48,9    | 39,1    | 46,9   | 44,3    | 51,1    | 47,8    | 43,4   | 48,2   | 44,9   | 38,2    | 34,4   | 41,9   | 35,9   | 36,5    | 35,5   |
|                           | Freeze Point, degrees F     | -40,7  | -38,5   | -53,0   | -54,6  | -63,9   | -30,8   | -50,9   | -53,5  | -55,2  | -56,6  | -56,2   | -99,6  | -91,9  | -98,3  | -48,0   | -93,9  |
|                           | Pour Point, degrees F       | -51,4  | -45,5   | -61,3   | -61,6  | -54,0   | -40,8   | -65,4   | -61,5  | -64,8  | -66,6  | -53,7   | -107,6 | -101,9 | -116,7 | -56,0   | -103,9 |
|                           | Viscosity at 100 deg. F, cs |        |         |         |        |         |         |         |        |        |        |         |        |        |        |         |        |
|                           | D                           | 1,41   | 1,62    | 1,46    | 1,43   | 1,44    | 1,44    | 1,41    | 1,48   | 1,41   | 1,52   | 1,51    | 1,66   | 1,57   | 1,56   | 1,54    | 1,65   |
|                           | Viscosity at 210 deg. F, cs |        |         |         |        |         |         |         |        |        |        |         |        |        |        |         |        |
|                           | D                           | 0,62   | 0,79    | 0,69    | 0,73   | 0,79    | 0,68    | 0,70    | 0,70   | 0,69   | 0,72   | 0,68    | 0,78   | 0,77   | 0,77   | 0,77    | 0,78   |
| Heavy kero, fr. 235-280°C |                             |        |         |         |        |         |         |         |        |        |        |         |        |        |        |         |        |
|                           | SG                          | 0,871  | 0,843   | 0,847   | 0,828  | 0,832   | 0,816   | 0,832   | 0,840  | 0,830  | 0,837  | 0,853   | 0,871  | 0,850  | 0,865  | 0,861   | 0,874  |
|                           | K <sub>w</sub>              | 11,29  | 11,66   | 11,61   | 11,90  | 11,82   | 12,06   | 11,82   | 11,72  | 11,86  | 11,77  | 11,53   | 11,31  | 11,59  | 11,39  | 11,42   | 11,27  |
|                           | S, %                        | 0,0223 | 0,0791  | 0,0459  | 0,2595 | 0,0702  | 0,0389  | 0,5923  | 0,8975 | 0,6805 | 0,6073 | 0,2986  | 0,6860 | 1,3089 | 0,7306 | 3,3876  | 3,6957 |

|                                     |        |         |         |        |         |         |         |        |        |        |         |        |        |        |         |        |
|-------------------------------------|--------|---------|---------|--------|---------|---------|---------|--------|--------|--------|---------|--------|--------|--------|---------|--------|
| N, %                                | ND     | 0,00038 | 0,00198 | 0,0060 | 0,00483 | 0,00529 | 0,00306 | 0,0053 | 0,0003 | 0,0032 | 0,00378 | 0,0035 | 0,0008 | 0,0106 | 0,01696 | ND     |
| Aniline Point,<br>degrees F D       | 132,9  | 154,9   | 140,2   | 155,7  | 151,2   | 171,6   | 145,4   | 143,1  | 146,8  | 142,1  | 139,2   | 122,7  | 136,9  | 130,7  | 124,5   | 114,9  |
| Aro, %                              | 37,6   | 17,8    | 35,5    | 17,2   | 22,9    | 12,3    | 21,3    | 25,2   | 27,7   | 27,8   | 27,1    | 13,4   | 35,0   | 34,0   | 24,5    | 26,7   |
| Smoke Point,<br>mm D                | 10,4   | 18,1    | 16,1    | 21,8   | 17,3    | 21,7    | 21,2    | 16,5   | 17,0   | 18,2   | 14,7    | 10,9   | 16,0   | 13,9   | 16,4    | 17,8   |
| Cetane Index                        | 38,5   | 47,1    | 46,0    | 52,7   | 51,0    | 57,3    | 51,2    | 48,2   | 51,8   | 49,5   | 44,1    | 38,9   | 45,2   | 40,6   | 41,7    | 38,2   |
| Freeze Point,<br>degrees F          | -7,1   | 9,4     | -11,5   | 1,0    | -33,2   | 15,0    | -31,8   | -17,2  | -12,0  | -17,7  | -16,5   | -70,6  | -49,6  | -57,3  | -12,0   | -38,9  |
| Pour Point,<br>degrees F            | -13,5  | 2,4     | -18,6   | -13,0  | -16,2   | 5,0     | -24,0   | -27,8  | -24,3  | -27,7  | -20,0   | -75,6  | -59,6  | -79,3  | -20,0   | -48,9  |
| Viscosity at<br>100 deg. F, cs      | 2,20   | 2,71    | 2,30    | 2,41   | 2,41    | 2,38    | 2,34    | 2,55   | 2,38   | 2,60   | 2,64    | 2,90   | 2,57   | 2,60   | 2,85    | 3,11   |
| Viscosity at<br>210 deg. F, cs      | 0,89   | 1,12    | 1,01    | 1,05   | 1,08    | 1,00    | 1,06    | 1,04   | 1,01   | 1,08   | 1,04    | 1,20   | 1,06   | 1,07   | 1,25    | 1,21   |
| Atm. gas oil, fr. 280-343°C         |        |         |         |        |         |         |         |        |        |        |         |        |        |        |         |        |
| SG                                  | 0,889  | 0,846   | 0,866   | 0,852  | 0,858   | 0,832   | 0,862   | 0,868  | 0,859  | 0,864  | 0,878   | 0,902  | 0,881  | 0,897  | 0,888   | 0,900  |
| K <sub>w</sub>                      | 11,43  | 12,01   | 11,72   | 11,94  | 11,84   | 12,22   | 11,79   | 11,72  | 11,84  | 11,77  | 11,58   | 11,28  | 11,55  | 11,34  | 11,45   | 11,31  |
| S, %                                | 0,0759 | 0,1115  | 0,0900  | 0,3770 | 0,3270  | 0,0540  | 1,1609  | 1,2323 | 1,2412 | 1,0858 | 0,6614  | 1,0811 | 1,9958 | 1,3078 | 3,8374  | 4,3964 |
| N, %                                | ND     | 0,00161 | 0,00764 | 0,0195 | 0,02103 | 0,02177 | 0,02272 | 0,0145 | 0,0016 | 0,0130 | 0,01399 | 0,0133 | 0,0027 | 0,0399 | 0,07008 | ND     |
| Aniline Point,<br>degrees F         | 159,1  | 172,7   | 155,3   | 166,5  | 165,3   | 189,8   | 152,8   | 153,4  | 158,0  | 149,5  | 150,6   | 128,7  | 144,3  | 135,4  | 135,3   | 118,0  |
| Cetane Index                        | 42,9   | 55,6    | 49,0    | 53,5   | 51,5    | 60,4    | 50,4    | 48,7   | 51,4   | 49,7   | 45,9    | 39,7   | 45,1   | 41,0   | 43,3    | 40,4   |
| Pour Point,<br>degrees F<br>D       | 32,7   | 49,6    | 29,5    | 39,1   | 23,1    | 58,7    | 17,7    | 12,2   | 21,3   | 29,1   | 16,6    | -33,9  | -17,2  | -31,1  | 21,1    | -10,5  |
| Viscosity at<br>100 deg. F, cs<br>D | 4,17   | 5,16    | 4,65    | 5,77   | 4,97    | 4,62    | 4,92    | 5,19   | 4,76   | 5,49   | 5,67    | 6,50   | 5,49   | 6,74   | 7,22    | 7,53   |
| Viscosity at<br>210 deg. F, cs<br>D | 1,44   | 1,72    | 1,74    | 1,68   | 1,67    | 1,61    | 1,76    | 1,69   | 1,63   | 1,85   | 1,75    | 2,08   | 1,68   | 1,83   | 2,22    | 2,08   |

|                            |                                     |       |         |          |          |          |          |          |          |          |          |          |          |          |          |          |          |
|----------------------------|-------------------------------------|-------|---------|----------|----------|----------|----------|----------|----------|----------|----------|----------|----------|----------|----------|----------|----------|
|                            | Viscosity at<br>210 deg. F, cs<br>D | 1,44  | 1,72    | 1,74     | 1,68     | 1,67     | 1,61     | 1,76     | 1,69     | 1,63     | 1,85     | 1,75     | 2,08     | 1,68     | 1,83     | 2,22     | 2,08     |
| VGO, fr. 343-565°C         |                                     |       |         |          |          |          |          |          |          |          |          |          |          |          |          |          |          |
|                            | K <sub>w</sub>                      | 11,56 | 12,42   | 11,76    | 11,99    | 12,05    | 12,36    | 11,80    | 11,82    | 11,77    | 11,80    | 11,72    | 11,39    | 11,56    | 11,46    | 11,56    | 11,49    |
|                            | S, %                                | 0,18  | 0,24    | 0,18     | 0,61     | 0,60     | 0,09     | 1,92     | 2,04     | 2,42     | 1,81     | 1,37     | 1,63     | 2,94     | 2,34     | 4,65     | 4,97     |
|                            | N, %                                | ND    | 0,03000 | 0,08124  | 0,1577   | 0,13385  | 0,14511  | 0,14361  | 0,1142   | 0,0855   | 0,1704   | 0,13764  | 0,4730   | 0,0536   | 0,1477   | 0,49696  | ND       |
|                            | Aniline Point,<br>degrees F         | 221   | 212     | 176      | 190      | 193      | 224      | 170      | 179      | 178      | 168      | 172      | 146      | 163      | 153      | 163      | 143      |
|                            | Cetane Index                        | 25,3  | 44,6    | 34,7     | 36,1     | 33,4     | 39,4     | 28,9     | 28,2     | 28,2     | 28,4     | 27,8     | 19,0     | 25,0     | 21,8     | 24,1     | 22,5     |
|                            | Pour Point,<br>degrees F            | 114,0 | 107,5   | 92,1     | 100,7    | 91,7     | 107,0    | 77,5     | 82,1     | 81,9     | 91,1     | 86,1     | 40,4     | 45,6     | 54,5     | 56,8     | 63,9     |
|                            | Viscosity at<br>100 deg. F, cs<br>D | 33,36 | 26,56   | 33,45    | 38,24    | 47,20    | 38,68    | 48,07    | 36,64    | 31,64    | 74,92    | 72,74    | 211,30   | 80,25    | 317,19   | 140,39   | 231,90   |
|                            | Viscosity at<br>210 deg. F, cs<br>D | 6,84  | 5,13    | 6,96     | 5,34     | 6,34     | 6,29     | 6,53     | 6,86     | 6,29     | 8,42     | 7,97     | 11,52    | 7,54     | 14,53    | 9,09     | 9,96     |
|                            | Ni, ppm wt.                         | 0,91  | 0,39    | 0,04     | ND       | ND       | 0,50     | 0,08     | 0,10     | 0,41     | 0,17     | 0,26     | 5,03     | 0,10     | 0,63     | 0,07     | ND       |
|                            | V, ppm wt.                          | 0,54  | 0,48    | 0,03     | ND       | ND       | 0,02     | 0,78     | 0,07     | 0,26     | 0,20     | 0,61     | 1,22     | 0,27     | 2,17     | 0,05     | ND       |
|                            | CCR, % wt                           | 1,94  | 1,05    | 0,14     | 0,45     | 0,09     | 0,02     | 0,38     | 0,66     | 0,80     | ND       | 0,48     | 1,50     | 1,28     | 1,00     | ND       | ND       |
|                            | CCR, % wt                           | 1,94  | 1,05    | 0,14     | 0,45     | 0,09     | 0,02     | 0,38     | 0,66     | 0,80     | ND       | 0,48     | 1,50     | 1,28     | 1,00     | ND       | ND       |
| Vacuum residue, fr. 565°C+ |                                     |       |         |          |          |          |          |          |          |          |          |          |          |          |          |          |          |
|                            | S, %                                |       |         | 0,4      | 2,1      | 1,2      | 0,1      | 3,8      | 3,9      | 4,8      | 3,5      | 2,6      | 2,5      | 6,1      | 3,7      | 7,2      | 6,3      |
|                            | Viscosity at<br>210 deg. F, cs      |       |         | 9,87E+02 | 9,77E+02 | 4,00E+02 | 2,96E+02 | 5,30E+03 | 7,44E+03 | 5,06E+03 | 1,29E+03 | 4,41E+03 | 2,40E+04 | 6,54E+04 | 4,30E+04 | 1,81E+05 | 4,98E+05 |
|                            | Ni, ppm wt.                         |       |         | 49,00    | 75,42    | 7,76     | 4,65     | 52,00    | 31,41    | 52,70    | 73,40    | 46,00    | 237,70   | 67,00    | 151,00   | 332,00   | 246,96   |
|                            | V, ppm wt.                          |       |         | 30,00    | 30,01    | 46,58    | 0,20     | 274,00   | 54,10    | 142,00   | 230,60   | 115,00   | 159,90   | 135,00   | 888,00   | 696,00   | 1975,66  |
|                            | CCR, wt. %                          |       |         | 9,10     | 19,00    | 15,80    | 12,43    | 23,60    | 22,60    | 22,60    | 18,53    | 19,50    | 22,75    | 22,60    | 26,50    | 25,75    | 24,00    |
|                            | Asph., wt. %.                       |       |         | 4,45     | 3,50     | 2,13     | 0,52     | 5,23     | 5,84     | 3,40     | 5,02     | 1,25     | 9,35     | 13,40    | 9,61     | 9,19     | 10,57    |

[illegible]

Table S2 TBP characterization (ASTM D-2892; up to 360 °C, and ASTM D-5236; >360 °C) of extra light, light, medium, and heavy crude oils

| Nr | TBP analysis, fractions, °C/yields, wt. % |           |       |            |             |             |             |             |             |             |             |             |             |             |             |             |                                              |             |             |             |             |             |       |       |
|----|-------------------------------------------|-----------|-------|------------|-------------|-------------|-------------|-------------|-------------|-------------|-------------|-------------|-------------|-------------|-------------|-------------|----------------------------------------------|-------------|-------------|-------------|-------------|-------------|-------|-------|
|    | ASTM D-2892 fractions, °C/yields, wt. %   |           |       |            |             |             |             |             |             |             |             |             |             |             |             |             | ASTM D-5236 2892 fractions, °C/yields, wt. % |             |             |             |             |             |       |       |
|    | D15,<br>g/cm3                             | Sul,<br>% | IP-70 | 70-<br>110 | 110-<br>130 | 130-<br>150 | 150-<br>180 | 180-<br>200 | 200-<br>220 | 220-<br>240 | 240-<br>260 | 260-<br>280 | 280-<br>300 | 300-<br>320 | 320-<br>340 | 340-<br>360 | 360-<br>380                                  | 380-<br>390 | 390-<br>430 | 430-<br>470 | 470-<br>490 | 490-<br>550 | > 550 |       |
| 1  | Urals                                     | 0.877     | 1.53  | 2.54       | 3.92        | 2.21        | 2.32        | 4.02        | 2.64        | 2.78        | 3.32        | 3.5         | 3.25        | 3.73        | 3.83        | 3.4         | 3.29                                         | 0.29        | 1.12        | 7.72        | 7.68        | 4.52        | 9     | 23.92 |
| 2  | Arab M                                    | 0.872     | 2.48  | 3.72       | 5.22        | 3           | 2.79        | 5.03        | 2.69        | 3.08        | 3.33        | 3.52        | 3.58        | 3.01        | 3.72        | 3.22        | 3.32                                         | 0.21        | 1.71        | 7.05        | 6.34        | 2.79        | 7.83  | 23.84 |
| 3  | Arab H                                    | 0.889     | 2.91  | 3.27       | 3.67        | 2.25        | 2.48        | 4.21        | 2.93        | 2.56        | 2.64        | 3.16        | 3.54        | 3.67        | 3.21        | 3.25        | 3.11                                         | 0.08        | 1.68        | 5.61        | 6.64        | 3.43        | 8.5   | 29.11 |
| 4  | Val'Dagri                                 | 0.832     | 1.97  | 6.83       | 7.94        | 4.42        | 4.58        | 6.72        | 3.42        | 3.73        | 3.8         | 3.85        | 3.61        | 3.49        | 3.64        | 3.53        | 3.26                                         | 0.35        | 1.03        | 7.24        | 5.26        | 3.09        | 5.57  | 13.64 |
| 5  | Basrah L                                  | 0.878     | 2.85  | 3.56       | 4.82        | 2.82        | 2.99        | 4.66        | 2.15        | 2.71        | 2.88        | 3.11        | 2.88        | 3.14        | 3.16        | 3.43        | 3.22                                         | 0.22        | 1.16        | 6.81        | 5.93        | 3.72        | 8.73  | 26.9  |
| 6  | Basrah H                                  | 0.905     | 3.86  | 3.03       | 3.64        | 2.37        | 2.64        | 4.03        | 2.25        | 2.71        | 2.86        | 2.94        | 2.86        | 3.33        | 2.81        | 3.26        | 2.53                                         | 0.18        | 1.16        | 6.05        | 6.38        | 3.56        | 8.55  | 31.86 |
| 7  | Kirkuk                                    | 0.873     | 2.65  | 3.88       | 5.56        | 3.1         | 3.33        | 5.38        | 2.38        | 3.06        | 3.06        | 3.38        | 3.57        | 3.35        | 3.33        | 3.29        | 3.25                                         | 0.22        | 1.09        | 6.96        | 6.65        | 2.46        | 8.08  | 23.62 |
| 8  | Iranian H                                 | 0.882     | 2.27  | 3.32       | 5.14        | 2.77        | 2.9         | 4.45        | 2.13        | 2.82        | 2.95        | 3.28        | 3.58        | 3.22        | 3.32        | 3.09        | 3.07                                         | 0.2         | 1.13        | 6.42        | 6.13        | 3.86        | 8.44  | 26.78 |
| 9  | KEB                                       | 0.876     | 2.64  | 3.54       | 4.92        | 2.83        | 2.76        | 4.71        | 2.58        | 2.96        | 3.25        | 3.33        | 3.6         | 3.12        | 3.15        | 3.22        | 3.45                                         | 0.09        | 0.53        | 7.31        | 6.34        | 3.5         | 7.41  | 26.4  |
| 10 | El Bouri                                  | 0.891     | 1.76  | 1.96       | 3.7         | 2.29        | 2.6         | 4.16        | 2.77        | 2.86        | 3.24        | 3.32        | 3.42        | 3.23        | 2.99        | 3.01        | 3.07                                         | 0.18        | 2.15        | 9.64        | 6.25        | 4.25        | 9.04  | 24.87 |
| 11 | Kazakh1                                   | 0.858     | 0.81  | 8.34       | 7.91        | 4.32        | 2.81        | 3.73        | 0.39        | 0.78        | 1.14        | 1.36        | 1.64        | 1.73        | 1.88        | 2.78        | 2.37                                         | 0.17        | 0.77        | 10.73       | 8.87        | 4.12        | 10.79 | 22.37 |
| 12 | Kazakh2                                   | 0.8754    | 0.65  | 1.89       | 3.43        | 1.89        | 2.08        | 3.61        | 2.27        | 2.36        | 3.02        | 3.13        | 3.36        | 3.61        | 3.6         | 3.58        | 3.32                                         | 0.08        | 2           | 9.59        | 8.28        | 3.79        | 8.49  | 25.62 |
| 13 | CPC1                                      | 0.7954    | 0.55  | 7.39       | 10.45       | 5.75        | 5.45        | 8.28        | 3.91        | 4.6         | 4.15        | 4.47        | 4.32        | 3.92        | 4.03        | 3.73        | 3.63                                         | 0.25        | 2.17        | 6.53        | 4.2         | 1.68        | 4.01  | 6.08  |
| 14 | CPC2                                      | 0.802     | 0.60  | 7.22       | 10.62       | 5.52        | 5.77        | 8.26        | 3.85        | 4.27        | 4.48        | 4.37        | 4.45        | 3.94        | 3.89        | 3.62        | 3.89                                         | 0.09        | 2.12        | 6.71        | 4.37        | 1.54        | 3.75  | 6.27  |
| 15 | LSCO                                      | 0.854     | 0.57  | 3.41       | 5.22        | 2.8         | 3.3         | 5.29        | 2.69        | 2.76        | 3.64        | 3.79        | 3.96        | 4.21        | 4.24        | 3.64        | 3.23                                         | 0.14        | 1.58        | 8.53        | 6.21        | 3.83        | 9.27  | 17.26 |
| 16 | Rhem.                                     | 0.865     | 0.75  | 3.67       | 5.76        | 3.36        | 3.58        | 5.63        | 2.69        | 2.93        | 3.62        | 3.87        | 3.72        | 3.94        | 3.86        | 3.06        | 3.14                                         | 0.08        | 1.71        | 6.63        | 7.51        | 3           | 8.49  | 18.75 |
| 17 | Prinos                                    | 0.875     | 3.71  | 4.69       | 5.38        | 3.21        | 3.24        | 5.15        | 2.61        | 2.86        | 3.12        | 3.32        | 3.46        | 3.78        | 4.58        | 3.72        | 3.54                                         | 0.15        | 1.7         | 6.73        | 7.56        | 4.03        | 7.24  | 18.93 |
| 18 | Azeri L                                   | 0.848     | 0.20  | 2.52       | 6.57        | 3.19        | 3.72        | 5.31        | 2.75        | 3.34        | 4.33        | 4.57        | 4.51        | 4.72        | 4.64        | 3.82        | 3.67                                         | 0.06        | 1.6         | 8.71        | 6.24        | 3.91        | 7.07  | 13.75 |
| 19 | SGC                                       | 0.883     | 2.26  | 7.05       | 4.49        | 2.51        | 2.32        | 4.14        | 1.64        | 1.7         | 2.66        | 2.79        | 2.8         | 3.38        | 2.96        | 3.18        | 3.03                                         | 0.1         | 1.55        | 6.13        | 6.07        | 3.66        | 8.19  | 28.65 |
| 20 | Oryx                                      | 0.9156    | 4.209 | 2.16       | 3.39        | 2.57        | 2.4         | 3.88        | 2.54        | 2.49        | 2.48        | 2.62        | 2.94        | 2.61        | 3.01        | 2.54        | 2.48                                         | 0.1         | 2.35        | 6.83        | 5.74        | 3.02        | 7.62  | 36.23 |
| 21 | Okwuib                                    | 0.868     | 0.20  | 1.93       | 5.26        | 3.39        | 2.81        | 4.38        | 3.53        | 3.37        | 4.26        | 5.94        | 6.46        | 6.12        | 6.09        | 5.34        | 4.95                                         | 0.12        | 3.73        | 9.54        | 8.67        | 3.04        | 4.87  | 6.20  |
| 22 | RasGharib                                 | 0.926     | 3.44  | 1.71       | 2.27        | 1.47        | 1.9         | 3.11        | 2.16        | 2.43        | 2.68        | 2.09        | 2.73        | 2.61        | 2.23        | 2.35        | 2.4                                          | 0.59        | 1.44        | 6.41        | 6.58        | 4.25        | 9     | 38.59 |
| 23 | Varandey                                  | 0.850     | 0.63  | 2.36       | 4.92        | 3.09        | 3.08        | 4.6         | 3.11        | 4.02        | 4.26        | 4.48        | 4.9         | 5.02        | 4.34        | 3.23        | 3.46                                         | 0.05        | 1.95        | 10.35       | 7.08        | 4.13        | 6.87  | 13.70 |
| 24 | Arab L                                    | 0.858     | 1.89  | 5.13       | 4.85        | 3.24        | 3.33        | 5.15        | 2.39        | 3.24        | 3.44        | 3.53        | 3.56        | 3.54        | 3.58        | 3.52        | 3.65                                         | 0.05        | 0.72        | 5.96        | 7.68        | 2.93        | 7.84  | 21.67 |
| 25 | KBT                                       | 0.876     | 2.91  | 4.97       | 4.97        | 3.03        | 3.34        | 5.23        | 2.77        | 3.18        | 3.13        | 3.23        | 3.24        | 3.23        | 3.15        | 3.18        | 3.34                                         | 0.04        | 1.16        | 6.47        | 6.91        | 2.81        | 7.83  | 23.79 |
| 26 | Tempa Rossa                               | 0.940     | 5.35  | 3.29       | 3.86        | 2.35        | 2.34        | 3.94        | 2.64        | 2.28        | 2.32        | 2.57        | 2.71        | 2.57        | 2.4         | 2.66        | 2.75                                         | 0.02        | 1.12        | 4.64        | 7.09        | 2.37        | 9.31  | 35.77 |
| 27 | Forties                                   | 0.817     | 0.68  | 8.14       | 9.96        | 4.77        | 4.72        | 6.28        | 3.35        | 3.41        | 3.62        | 3.64        | 3.5         | 3.55        | 3.41        | 3.11        | 3.06                                         | 1.25        | 3.54        | 5.7         | 4.59        | 1.54        | 7.25  | 10.61 |
| 28 | Aseng                                     | 0.8741    | 0.258 | 1.94       | 3.94        | 2.57        | 2.48        | 4.01        | 3.06        | 3.2         | 3.21        | 3.18        | 4.2         | 4.43        | 4.56        | 3.7         | 3.59                                         | 0.03        | 0.8         | 12.36       | 12.86       | 5.63        | 8.01  | 12.24 |
| 29 | Kuwait L                                  | 0.8313    | 1.049 | 4.31       | 6.40        | 4.11        | 4.57        | 7.62        | 4.41        | 4.46        | 4.32        | 4.28        | 4.45        | 3.91        | 3.91        | 3.89        | 3.99                                         | 0.06        | 1.08        | 7.54        | 6.12        | 2.64        | 1.47  | 15.46 |
| 30 | Cheleken                                  | 0.8469    | 0.4   | 1.30       | 4.23        | 2.40        | 2.68        | 4.96        | 3.36        | 3.46        | 4.43        | 4.57        | 4.66        | 5.07        | 5.05        | 4.49        | 4.57                                         | 0.08        | 0.63        | 9.67        | 8.79        | 1.88        | 7.15  | 15.57 |
| 31 | Caspian H                                 | 0.9304    | 1.864 | 0.00       | 0.00        | 0.00        | 0.42        | 1.82        | 1.04        | 1.89        | 2.48        | 3.24        | 3.64        | 3.36        | 3.90        | 4.75        | 4.78                                         | 0.03        | 1.93        | 8.83        | 10.46       | 4.28        | 10.22 | 32.93 |
| 32 | Kumkol                                    | 0.8209    | 0.22  | 4.32       | 6.67        | 4.21        | 3.43        | 5.27        | 3.29        | 3.32        | 3.54        | 3.92        | 3.89        | 4.06        | 3.43        | 3.55        | 3.89                                         | 0.97        | 1.95        | 10.74       | 5.78        | 3.44        | 6.75  | 12.58 |
| 33 | Bonga                                     | 0.875     | 0.249 | 2.38       | 5.22        | 3.01        | 2.94        | 4.45        | 3.57        | 3.22        | 4.00        | 6.01        | 6.24        | 5.81        | 6.58        | 5.05        | 3.73                                         | 0.19        | 2.63        | 8.16        | 7.99        | 3.51        | 5.54  | 8.77  |



|    |            |        |      |      |      |      |      |      |      |      |      |      |      |      |      |      |      |             |      |      |      |      |       |       |
|----|------------|--------|------|------|------|------|------|------|------|------|------|------|------|------|------|------|------|-------------|------|------|------|------|-------|-------|
| 34 | Forouzan   | 0.8764 | 2.39 | 4.20 | 5.68 | 3.26 | 3.01 | 5.58 | 3.10 | 3.29 | 2.99 | 3.27 | 2.53 | 2.47 | 2.98 | 2.84 | 2.77 | <b>0.26</b> | 1.66 | 8.29 | 6.09 | 3.77 | 6.28  | 24.68 |
| 35 | Bozachi    | 0.9065 | 1.57 | 0.53 | 1.85 | 1.47 | 1.05 | 2.11 | 1.52 | 2.24 | 3.06 | 3.00 | 3.06 | 2.95 | 3.09 | 2.97 | 3.59 | <b>0.84</b> | 2.02 | 9.66 | 9.66 | 3.74 | 10.40 | 30.81 |
| 36 | El Sharara | 0.8140 | 0.08 | 6.93 | 9.09 | 5.25 | 4.92 | 7.20 | 4.34 | 4.46 | 4.73 | 4.59 | 4.24 | 4.13 | 4.05 | 3.63 | 3.59 | <b>0.21</b> | 0.97 | 6.77 | 5.09 | 2.32 | 4.98  | 7.51  |
| 37 | Helm       | 0.9350 | 1.71 | 0.36 | 1.85 | 1.49 | 1.52 | 2.45 | 1.67 | 2.28 | 2.42 | 2.88 | 3.20 | 3.32 | 3.73 | 3.72 | 3.73 | <b>0.03</b> | 0.77 | 7.14 | 9.50 | 3.07 | 9.77  | 34.10 |

Table S3 Density at 15°C of TBP crude fractions of extra light, light, medium, and heavy crude oils

|    |           | IBP-<br>70<br>°C | 70-<br>100<br>°C | 100-<br>110<br>°C | 110-<br>130<br>°C | 130-<br>150<br>°C | 150-<br>170<br>°C | 170-<br>180<br>°C | 180-<br>200<br>°C | 200-<br>220<br>°C | 220-<br>240<br>°C | 240-<br>260<br>°C | 260-<br>280<br>°C | 280-<br>300<br>°C | 300-<br>320<br>°C | 320-<br>340<br>°C | 340-<br>360<br>°C | 360-<br>380<br>°C | 380-<br>390<br>°C | 390-<br>430<br>°C | 430-<br>470<br>°C | 470-<br>490<br>°C | 490-<br>540<br>°C | 540-<br>550<br>°C | > 550<br>°C |
|----|-----------|------------------|------------------|-------------------|-------------------|-------------------|-------------------|-------------------|-------------------|-------------------|-------------------|-------------------|-------------------|-------------------|-------------------|-------------------|-------------------|-------------------|-------------------|-------------------|-------------------|-------------------|-------------------|-------------------|-------------|
| Nr |           | °C               | °C               | °C                | °C                | °C                | °C                | °C                | °C                | °C                | °C                | °C                | °C                | °C                | °C                | °C                | °C                | °C                | °C                | °C                | °C                | °C                | °C                | °C                | °C          |
| 1  | Urals     | 0,690            | 0,726            | 0,742             | 0,754             | 0,766             | 0,780             | 0,790             | 0,801             | 0,811             | 0,822             | 0,834             | 0,851             | 0,853             | 0,857             | 0,872             | 0,879             | 0,888             | 0,895             | 0,909             | 0,918             | 0,928             | 0,937             | 0,996             |             |
| 2  | Arab M    | 0,669            | 0,718            | 0,737             | 0,750             | 0,763             | 0,776             | 0,784             | 0,791             | 0,801             | 0,815             | 0,831             | 0,848             | 0,849             | 0,853             | 0,866             | 0,885             | 0,895             | 0,905             | 0,923             | 0,936             | 0,947             | 0,954             | 1,030             |             |
| 3  | Arab H    | 0,647            | 0,702            | 0,724             | 0,734             | 0,749             | 0,766             | 0,775             | 0,791             | 0,799             | 0,810             | 0,827             | 0,844             | 0,853             | 0,872             | 0,891             | 0,898             | 0,900             | 0,908             | 0,924             | 0,936             | 0,948             | 0,959             | 1,040             |             |
| 4  | Vald'Agri | 0,655            | 0,713            | 0,736             | 0,746             | 0,762             | 0,775             | 0,782             | 0,791             | 0,797             | 0,809             | 0,827             | 0,851             | 0,856             | 0,862             | 0,884             | 0,898             | 0,908             | 0,916             | 0,932             | 0,952             | 0,965             | 0,972             | 1,052             |             |
| 5  | Basrah L  | 0,666            | 0,714            | 0,734             | 0,747             | 0,761             | 0,775             | 0,783             | 0,792             | 0,799             | 0,809             | 0,825             | 0,846             | 0,849             | 0,855             | 0,875             | 0,886             | 0,897             | 0,906             | 0,922             | 0,934             | 0,947             | 0,956             | 1,051             |             |
| 6  | Basrah H  | 0,672            | 0,714            | 0,733             | 0,748             | 0,763             | 0,778             | 0,787             | 0,800             | 0,806             | 0,818             | 0,836             | 0,851             | 0,860             | 0,872             | 0,891             | 0,908             | 0,911             | 0,921             | 0,940             | 0,951             | 0,963             | 0,976             | 1,070             |             |
| 7  | Kirkuk    | 0,665            | 0,715            | 0,735             | 0,747             | 0,762             | 0,777             | 0,785             | 0,794             | 0,802             | 0,813             | 0,828             | 0,847             | 0,849             | 0,857             | 0,876             | 0,888             | 0,896             | 0,906             | 0,922             | 0,937             | 0,948             | 0,952             | 1,053             |             |
| 8  | Iranian H | 0,672            | 0,726            | 0,746             | 0,756             | 0,768             | 0,780             | 0,788             | 0,798             | 0,807             | 0,819             | 0,833             | 0,852             | 0,853             | 0,859             | 0,879             | 0,887             | 0,896             | 0,905             | 0,922             | 0,936             | 0,946             | 0,958             | 1,049             |             |
| 9  | KEB       | 0,667            | 0,718            | 0,736             | 0,748             | 0,762             | 0,776             | 0,783             | 0,794             | 0,801             | 0,813             | 0,830             | 0,848             | 0,849             | 0,855             | 0,869             | 0,884             | 0,896             | 0,902             | 0,922             | 0,933             | 0,945             | 0,956             | 1,036             |             |
| 10 | El Bouri  | 0,676            | 0,735            | 0,761             | 0,765             | 0,771             | 0,784             | 0,792             | 0,806             | 0,817             | 0,827             | 0,842             | 0,861             | 0,861             | 0,871             | 0,872             | 0,888             | 0,890             | 0,897             | 0,915             | 0,923             | 0,934             | 0,943             | 1,049             |             |
| 11 | Kazakh 1  | 0,671            | 0,712            | 0,744             | 0,754             | 0,766             | 0,780             | 0,792             | 0,808             | 0,813             | 0,823             | 0,836             | 0,852             | 0,853             | 0,859             | 0,875             | 0,880             | 0,879             | 0,883             | 0,894             | 0,901             | 0,911             | 0,923             | 0,989             |             |
| 12 | Kazakh 2  | 0,674            | 0,728            | 0,743             | 0,751             | 0,760             | 0,772             | 0,781             | 0,799             | 0,808             | 0,819             | 0,827             | 0,836             | 0,843             | 0,852             | 0,856             | 0,869             | 0,869             | 0,876             | 0,889             | 0,896             | 0,903             | 0,912             | 0,973             |             |
| 13 | CPC1      | 0,663            | 0,725            | 0,744             | 0,755             | 0,768             | 0,782             | 0,790             | 0,800             | 0,805             | 0,817             | 0,827             | 0,838             | 0,841             | 0,846             | 0,860             | 0,872             | 0,877             | 0,881             | 0,893             | 0,901             | 0,911             | 0,922             | 0,956             |             |
| 14 | CPC2      | 0,663            | 0,725            | 0,741             | 0,758             | 0,770             | 0,784             | 0,792             | 0,800             | 0,805             | 0,813             | 0,825             | 0,843             | 0,841             | 0,846             | 0,860             | 0,873             | 0,877             | 0,882             | 0,895             | 0,901             | 0,913             | 0,924             | 0,981             |             |
| 15 | LSCO1     | 0,688            | 0,730            | 0,743             | 0,757             | 0,770             | 0,783             | 0,794             | 0,805             | 0,811             | 0,822             | 0,834             | 0,849             | 0,850             | 0,858             | 0,869             | 0,875             | 0,885             | 0,891             | 0,904             | 0,912             | 0,921             | 0,931             | 0,992             |             |
| 16 | Rhem.     | 0,700            | 0,738            | 0,746             | 0,759             | 0,773             | 0,787             | 0,798             | 0,809             | 0,815             | 0,824             | 0,836             | 0,846             | 0,847             | 0,853             | 0,869             | 0,880             | 0,887             | 0,894             | 0,907             | 0,918             | 0,929             | 0,939             | 1,039             |             |
| 17 | Prinos    | 0,668            | 0,730            | 0,749             | 0,769             | 0,783             | 0,801             | 0,811             | 0,819             | 0,820             | 0,825             | 0,738             | 0,858             | 0,855             | 0,854             | 0,888             | 0,909             | 0,914             | 0,922             | 0,942             | 0,954             | 0,966             | 0,986             | 1,107             |             |
| 18 | Azeri L   | 0,700            | 0,744            | 0,755             | 0,766             | 0,775             | 0,787             | 0,796             | 0,808             | 0,812             | 0,823             | 0,834             | 0,848             | 0,845             | 0,849             | 0,865             | 0,874             | 0,876             | 0,886             | 0,904             | 0,911             | 0,919             | 0,925             | 0,966             |             |
| 19 | SGC       | 0,686            | 0,759            | 0,753             | 0,762             | 0,771             | 0,785             | 0,796             | 0,805             | 0,811             | 0,820             | 0,834             | 0,847             | 0,856             | 0,865             | 0,881             | 0,891             | 0,900             | 0,909             | 0,926             | 0,935             | 0,946             | 0,954             | 1,049             |             |
| 20 | Oryx      | 0,659            | 0,712            |                   | 0,738             | 0,753             | 0,768             | 0,778             | 0,789             | 0,796             | 0,807             | 0,822             | 0,846             | 0,852             | 0,861             | 0,876             | 0,886             | 0,896             | 0,911             | 0,933             | 0,947             | 0,960             | 0,966             | 1,088             |             |
| 21 | Okwuib    | 0,669            | 0,736            |                   | 0,752             | 0,765             | 0,778             | 0,789             | 0,807             | 0,822             | 0,834             | 0,856             | 0,875             | 0,872             | 0,883             | 0,902             | 0,905             | 0,913             | 0,923             | 0,941             | 0,948             | 0,954             | 0,962             | 0,975             |             |
| 22 | RasGharib | 0,666            | 0,722            | 0,735             | 0,746             | 0,764             | 0,773             | 0,789             | 0,804             | 0,815             | 0,828             | 0,849             | 0,857             | 0,859             | 0,862             | 0,871             | 0,883             | 0,894             | 0,900             | 0,916             | 0,925             | 0,936             | 0,949             | 1,058             |             |
| 23 | Varandey  | 0,666            | 0,741            |                   | 0,757             | 0,771             | 0,780             | 0,786             | 0,793             | 0,810             | 0,819             | 0,831             | 0,845             | 0,845             | 0,853             | 0,869             | 0,871             | 0,872             | 0,877             | 0,889             | 0,896             | 0,907             | 0,911             | 0,990             |             |
| 24 | Arab L    | 0,645            | 0,705            | 0,727             | 0,738             | 0,755             | 0,769             | 0,779             | 0,790             | 0,798             | 0,807             | 0,821             | 0,835             | 0,849             | 0,852             | 0,867             | 0,882             | 0,894             | 0,899             | 0,914             | 0,928             | 0,941             | 0,953             | 1,028             |             |
| 25 | KBT       | 0,647            | 0,703            | 0,728             | 0,738             | 0,759             | 0,773             | 0,783             | 0,790             | 0,801             | 0,812             | 0,828             | 0,844             | 0,857             | 0,859             | 0,876             | 0,893             | 0,905             | 0,909             | 0,925             | 0,941             | 0,954             | 0,970             | 1,066             |             |

|    | Tempa               |       |       |       |       |       |       |       |       |       |       |       |       |       |       |       |       |       |       |       |       |       |       |       |  |
|----|---------------------|-------|-------|-------|-------|-------|-------|-------|-------|-------|-------|-------|-------|-------|-------|-------|-------|-------|-------|-------|-------|-------|-------|-------|--|
| 26 | Rossa               | 0,652 | 0,702 | 0,726 | 0,740 | 0,760 | 0,773 | 0,784 | 0,796 | 0,807 | 0,819 | 0,840 | 0,864 | 0,885 | 0,885 | 0,901 | 0,921 | 0,936 | 0,944 | 0,963 | 0,979 | 0,995 | 1,012 | 1,119 |  |
| 27 | Forties             | 0,651 | 0,726 | 0,753 | 0,752 | 0,771 | 0,777 | 0,784 | 0,792 | 0,805 | 0,818 | 0,830 | 0,839 | 0,846 | 0,847 | 0,861 | 0,872 | 0,898 | 0,915 | 0,916 | 0,917 | 0,940 | 0,953 | 0,989 |  |
| 28 | Aseng               | 0,674 | 0,750 |       | 0,768 | 0,784 | 0,797 | 0,807 | 0,824 | 0,830 | 0,835 | 0,848 | 0,865 | 0,845 | 0,858 | 0,877 | 0,880 | 0,880 | 0,883 | 0,893 | 0,896 | 0,902 | 0,912 | 0,984 |  |
| 29 | Kuwait L            | 0,650 | 0,695 | 0,717 | 0,730 | 0,750 | 0,768 | 0,778 | 0,786 | 0,795 | 0,803 | 0,816 | 0,831 | 0,844 | 0,848 | 0,864 | 0,882 | 0,895 | 0,900 | 0,916 | 0,929 | 0,938 |       | 0,983 |  |
| 30 | Cheleken<br>Caspian | 0,674 | 0,725 | 0,739 | 0,748 | 0,760 | 0,772 | 0,781 | 0,790 | 0,803 | 0,810 | 0,819 | 0,827 | 0,833 | 0,835 | 0,848 | 0,857 | 0,868 | 0,873 | 0,887 | 0,897 | 0,906 | 0,914 | 0,974 |  |
| 31 | H                   |       |       |       | 0,793 | 0,808 | 0,823 | 0,831 | 0,838 | 0,846 | 0,855 | 0,866 | 0,871 | 0,877 | 0,889 | 0,899 | 0,903 | 0,908 | 0,920 | 0,929 | 0,937 | 0,941 | 1,078 |       |  |
| 32 | Kumkol              | 0,652 | 0,726 |       | 0,748 | 0,761 | 0,771 | 0,776 | 0,786 | 0,794 | 0,804 | 0,816 | 0,829 | 0,823 | 0,828 | 0,837 | 0,840 | 0,843 | 0,851 | 0,874 | 0,881 | 0,890 | 0,901 | 0,961 |  |
| 33 | Bonga               | 0,658 | 0,746 |       | 0,770 | 0,787 | 0,801 | 0,810 | 0,826 | 0,837 | 0,848 | 0,868 | 0,875 | 0,876 | 0,884 | 0,892 | 0,908 | 0,916 | 0,926 | 0,943 | 0,951 | 0,955 | 0,967 | 1,001 |  |
| 34 | Forouzan            | 0,673 | 0,723 | 0,743 | 0,754 | 0,766 | 0,778 | 0,786 | 0,797 | 0,807 | 0,820 | 0,835 | 0,851 | 0,850 | 0,855 | 0,866 | 0,872 | 0,888 | 0,892 | 0,903 | 0,924 | 0,934 | 0,946 | 1,018 |  |
| 35 | Bozachi             | 0,680 | 0,726 | 0,745 | 0,756 | 0,770 | 0,785 | 0,795 | 0,807 | 0,818 | 0,820 | 0,825 | 0,850 | 0,851 | 0,851 | 0,866 | 0,873 | 0,883 | 0,900 | 0,908 | 0,919 | 0,929 | 0,938 | 1,006 |  |
| 36 | El Sharara          | 0,647 | 0,712 | 0,732 | 0,742 | 0,759 | 0,773 | 0,784 | 0,794 | 0,808 | 0,818 | 0,832 | 0,842 | 0,850 | 0,854 | 0,867 | 0,877 | 0,889 | 0,894 | 0,906 | 0,916 | 0,928 | 0,934 | 0,982 |  |
| 37 | Helm                | 0,706 | 0,711 | 0,746 | 0,760 | 0,772 | 0,783 | 0,792 | 0,806 | 0,824 | 0,834 | 0,843 | 0,855 | 0,867 | 0,870 | 0,887 | 0,903 | 0,921 | 0,926 | 0,938 | 0,946 | 0,956 | 0,960 | 1,018 |  |

Table S4 Sulphur content of TBP crude fractions of extra light, light, medium, and heavy crude oils

| Nr           | IBP-<br>70 °C | 70-<br>100<br>°C | 100-<br>110<br>°C | 110-<br>130<br>°C | 130-<br>150<br>°C | 150-<br>170<br>°C | 170-<br>180<br>°C | 180-<br>200<br>°C | 200-<br>220<br>°C | 220-<br>240<br>°C | 240-<br>260<br>°C | 260-<br>280<br>°C | 280-<br>300<br>°C | 300-<br>320<br>°C | 320-<br>340<br>°C | 340-<br>360<br>°C | 380-<br>390<br>°C | 390-<br>430<br>°C | 430-<br>470<br>°C | 470-<br>490<br>°C | 490-<br>540<br>°C | 540-<br>550<br>°C | > 550<br>°C |
|--------------|---------------|------------------|-------------------|-------------------|-------------------|-------------------|-------------------|-------------------|-------------------|-------------------|-------------------|-------------------|-------------------|-------------------|-------------------|-------------------|-------------------|-------------------|-------------------|-------------------|-------------------|-------------------|-------------|
| 1 Urals      | 0,067         | 0,071            | 0,094             | 0,103             | 0,126             | 0,180             | 0,219             | 0,246             | 0,275             | 0,350             | 0,534             | 0,835             | 0,876             | 0,916             | 1,180             | 1,329             | 1,353             | 1,481             | 1,537             | 1,686             | 1,817             | 1,882             | 2,926       |
| 2 Arab M     | 0,075         | 0,068            | 0,082             | 0,091             | 0,114             | 0,150             | 0,183             | 0,226             | 0,266             | 0,426             | 0,776             | 1,277             | 1,345             | 1,511             | 2,100             | 2,404             | 2,421             | 2,546             | 2,632             | 2,918             | 3,053             | 3,384             | 5,267       |
| 3 Arab H     | 0,035         | 0,031            | 0,048             | 0,050             | 0,070             | 0,106             | 0,138             | 0,178             | 0,254             | 0,473             | 0,931             | 1,607             | 1,721             | 1,829             | 2,330             | 2,504             | 2,642             | 2,710             | 2,871             | 3,115             | 3,512             | 3,751             | 5,764       |
| 4 Vald'Agri  | 0,070         | 0,059            | 0,060             | 0,073             | 0,098             | 0,136             | 0,167             | 0,195             | 0,241             | 0,387             | 0,875             | 1,374             | 1,641             | 1,836             | 2,345             | 2,828             | 2,882             | 2,981             | 3,314             | 3,611             | 3,956             | 4,200             | 6,152       |
| 5 Basrah L   | 0,055         | 0,054            | 0,089             | 0,122             | 0,159             | 0,208             | 0,251             | 0,329             | 0,376             | 0,543             | 0,959             | 1,538             | 1,808             | 2,016             | 2,514             | 2,989             | 3,024             | 3,524             | 3,912             | 4,126             | 4,421             | 4,807             | 6,135       |
| 6 Basrah H   | 0,023         | 0,024            | 0,066             | 0,109             | 0,168             | 0,233             | 0,292             | 0,420             | 0,473             | 0,765             | 1,336             | 1,874             | 2,133             | 2,427             | 3,118             | 3,502             | 3,598             | 3,623             | 3,967             | 4,191             | 4,632             | 4,783             | 7,121       |
| 7 Kirkuk     | 0,044         | 0,050            | 0,069             | 0,101             | 0,135             | 0,165             | 0,186             | 0,209             | 0,249             | 0,386             | 0,730             | 1,289             | 1,431             | 1,624             | 2,237             | 2,563             | 2,596             | 2,655             | 2,963             | 3,166             | 3,599             | 3,884             | 5,894       |
| 8 Iranian H  | 0,071         | 0,058            | 0,082             | 0,100             | 0,138             | 0,181             | 0,210             | 0,252             | 0,308             | 0,464             | 0,789             | 1,247             | 1,293             | 1,398             | 1,784             | 2,073             | 2,098             | 2,169             | 2,398             | 2,553             | 2,836             | 3,070             | 5,154       |
| 9 KEB        | 0,056         | 0,051            | 0,069             | 0,073             | 0,081             | 0,111             | 0,139             | 0,173             | 0,236             | 0,387             | 0,730             | 1,298             | 1,460             | 1,660             | 2,252             | 2,467             | 2,505             | 2,622             | 2,921             | 3,051             | 3,413             | 3,777             | 5,682       |
| 10 El Bouri  | 0,019         | 0,013            | 0,039             | 0,049             | 0,021             | 0,038             | 0,058             | 0,097             | 0,151             | 0,281             | 0,687             | 1,168             | 1,255             | 1,518             | 1,601             | 1,647             | 1,717             | 1,758             | 1,790             | 1,932             | 2,030             | 2,201             | 3,649       |
| 11 Kazakh 1  | 0,021         | 0,032            | 0,038             | 0,023             | 0,024             | 0,024             | 0,030             | 0,036             | 0,042             | 0,061             | 0,088             | 0,126             | 0,159             | 0,196             | 0,275             | 0,345             | 0,327             | 0,321             | 0,345             | 0,373             | 0,449             | 0,517             | 0,943       |
| 12 Kazakh 2  | 0,037         | 0,042            | 0,053             | 0,060             | 0,090             | 0,122             | 0,160             | 0,162             | 0,169             | 0,220             | 0,343             | 0,508             | 0,528             | 0,641             | 0,998             | 1,150             | 0,895             | 0,820             | 0,817             | 0,835             | 0,947             | 1,110             | 1,694       |
| 13 CPC1      | 0,116         | 0,155            | 0,228             | 0,248             | 0,316             | 0,282             | 0,243             | 0,240             | 0,245             | 0,283             | 0,397             | 0,612             | 0,635             | 0,763             | 1,190             | 1,364             | 1,103             | 1,113             | 1,221             | 1,299             | 1,316             | 1,357             | 1,386       |
| 14 CPC2      | 0,112         | 0,159            | 0,231             | 0,251             | 0,319             | 0,286             | 0,250             | 0,247             | 0,243             | 0,290             | 0,405             | 0,573             | 0,620             | 0,735             | 1,049             | 1,315             | 1,098             | 1,087             | 1,174             | 1,227             | 1,281             | 1,309             | 1,323       |
| 15 LSCO1     | 0,024         | 0,036            | 0,049             | 0,055             | 0,056             | 0,067             | 0,076             | 0,086             | 0,091             | 0,115             | 0,166             | 0,255             | 0,296             | 0,363             | 0,502             | 0,573             | 0,626             | 0,668             | 0,754             | 0,833             | 0,943             | 1,065             | 1,583       |
| 16 Rhem.     | 0,049         | 0,046            | 0,056             | 0,052             | 0,051             | 0,059             | 0,067             | 0,078             | 0,090             | 0,128             | 0,232             | 0,389             | 0,453             | 0,538             | 0,751             | 0,896             | 0,829             | 0,852             | 0,938             | 1,002             | 1,120             | 1,230             | 1,895       |
| 17 Prinos    | 0,170         | 0,164            | 0,194             | 0,255             | 0,388             | 0,485             | 0,553             | 0,637             | 0,674             | 0,834             | 1,444             | 2,422             | 2,376             | 2,201             | 3,308             | 3,939             | 3,367             | 3,388             | 3,610             | 4,076             | 4,899             | 5,187             | 9,137       |
| 18 Azeri L   | 0,059         | 0,061            | 0,061             | 0,062             | 0,065             | 0,066             | 0,069             | 0,073             | 0,074             | 0,077             | 0,092             | 0,117             | 0,120             | 0,134             | 0,184             | 0,214             | 0,205             | 0,217             | 0,231             | 0,263             | 0,305             | 0,357             | 0,538       |
| 19 SGC       | 0,057         | 0,061            | 0,075             | 0,085             | 0,113             | 0,170             | 0,211             | 0,267             | 0,309             | 0,395             | 0,619             | 0,912             | 1,043             | 1,163             | 1,495             | 1,719             | 1,787             | 1,921             | 2,173             | 2,317             | 2,566             | 2,573             | 5,089       |
| 20 Oryx      | 0,006         |                  | 0,004             | 0,020             | 0,040             | 0,081             | 0,139             | 0,206             | 0,290             | 0,487             | 0,784             | 1,620             | 1,827             | 2,062             | 2,548             | 2,915             | 3,039             | 3,303             | 3,712             | 4,097             | 4,621             | 4,983             | 8,014       |
| 21 Okwuib    | 0,077         |                  | 0,073             | 0,075             | 0,075             | 0,078             | 0,082             | 0,087             | 0,096             | 0,101             | 0,114             | 0,144             | 0,176             | 0,193             | 0,239             | 0,272             | 0,278             | 0,281             | 0,275             | 0,302             | 0,356             | 0,414             | 0,497       |
| 22 RasGharib | 0,058         | 0,062            | 0,058             | 0,110             | 0,284             | 0,457             | 0,643             | 0,853             | 0,942             | 1,216             | 1,988             | 2,339             | 2,299             | 2,179             | 2,338             | 2,665             | 2,856             | 2,789             | 2,929             | 3,037             | 3,325             | 3,751             | 5,578       |
| 23 Varandey  | 0,024         |                  | 0,025             | 0,054             | 0,094             | 0,114             | 0,124             | 0,134             | 0,152             | 0,170             | 0,240             | 0,371             | 0,459             | 0,610             | 0,650             | 0,660             | 0,662             | 0,709             | 0,714             | 0,802             | 0,815             | 0,825             | 1,764       |

|    |                     |        |        |        |        |        |        |        |        |       |       |       |       |       |       |       |       |       |       |       |       |       |       |       |
|----|---------------------|--------|--------|--------|--------|--------|--------|--------|--------|-------|-------|-------|-------|-------|-------|-------|-------|-------|-------|-------|-------|-------|-------|-------|
| 24 | Arab L              | 0,087  | 0,083  | 0,102  | 0,107  | 0,132  | 0,150  | 0,170  | 0,197  | 0,227 | 0,319 | 0,580 | 0,958 | 1,288 | 1,348 | 1,777 | 2,215 | 2,253 | 2,226 | 2,408 | 2,624 | 2,880 | 3,205 | 4,861 |
| 25 | KBT<br>Tempa        | 0,048  | 0,056  | 0,086  | 0,109  | 0,163  | 0,214  | 0,234  | 0,255  | 0,279 | 0,384 | 0,730 | 1,202 | 1,614 | 1,630 | 2,136 | 2,648 | 2,657 | 2,678 | 2,870 | 3,201 | 3,788 | 4,142 | 6,496 |
| 26 | Rossa               | 0,064  | 0,058  | 0,103  | 0,159  | 0,357  | 0,551  | 0,709  | 0,909  | 1,117 | 1,414 | 2,224 | 3,193 | 3,867 | 3,576 | 3,945 | 4,592 | 4,758 | 4,662 | 4,817 | 5,154 | 5,671 | 7,041 | 9,257 |
| 27 | Forties             | 0,0399 | 0,0453 | 0,0648 | 0,0627 | 0,0733 | 0,0629 | 0,0726 | 0,0874 | 0,106 | 0,133 | 0,205 | 0,310 | 0,430 | 0,497 | 0,695 | 0,838 | 1,252 | 1,333 | 1,392 | 1,431 | 1,562 | 1,809 | 2,539 |
| 28 | Aseng               | 0,077  |        | 0,075  | 0,082  | 0,096  | 0,117  | 0,134  | 0,151  | 0,160 | 0,170 | 0,203 | 0,268 | 0,221 | 0,256 | 0,336 | 0,354 | 0,320 | 0,316 | 0,307 | 0,333 | 0,342 | 0,371 | 0,621 |
| 29 | Kuwait L            | 0,060  | 0,048  | 0,061  | 0,058  | 0,063  | 0,073  | 0,070  | 0,073  | 0,077 | 0,107 | 0,224 | 0,466 | 0,677 | 0,787 | 1,252 | 1,831 | 1,815 | 1,716 | 1,876 | 2,047 |       |       |       |
| 30 | Cheleken<br>Caspian | 0,072  | 0,077  | 0,085  | 0,085  | 0,084  | 0,089  | 0,097  | 0,108  | 0,104 | 0,110 | 0,129 | 0,159 | 0,201 | 0,221 | 0,293 | 0,349 | 0,371 | 0,368 | 0,395 | 0,447 | 0,520 | 0,623 | 1,201 |
| 31 | H                   |        |        |        | 0,098  | 0,110  | 0,143  | 0,168  | 0,199  | 0,251 | 0,365 | 0,566 | 0,731 | 0,902 | 1,196 | 1,425 | 1,391 | 1,429 | 1,564 | 1,689 | 1,897 | 1,948 | 3,368 |       |
| 32 | Kumkol              | 0,021  | 0,031  | 0,040  | 0,053  | 0,059  | 0,059  | 0,061  | 0,057  | 0,066 | 0,087 | 0,135 | 0,136 | 0,179 | 0,271 | 0,284 | 0,224 | 0,205 | 0,223 | 0,247 | 0,284 | 0,349 | 0,405 | 0,697 |
| 33 | Bonga               | 0,015  |        | 0,009  | 0,015  | 0,022  | 0,031  | 0,043  | 0,052  | 0,067 | 0,083 | 0,119 | 0,190 | 0,214 | 0,230 | 0,281 | 0,304 | 0,321 | 0,337 | 0,344 | 0,394 | 0,484 | 0,574 | 0,742 |
| 34 | Forouzan            | 0,043  | 0,043  | 0,067  | 0,097  | 0,196  | 0,224  | 0,244  | 0,264  | 0,350 | 0,552 | 0,890 | 1,263 | 1,271 | 1,405 | 1,672 | 1,856 | 2,267 | 2,415 | 2,636 | 2,788 | 3,015 | 3,071 | 5,023 |
| 35 | Bozachi             | 0,014  | 0,007  | 0,009  | 0,008  | 0,022  | 0,043  | 0,066  | 0,089  | 0,118 | 0,295 | 0,325 | 0,532 | 0,679 | 0,729 | 1,044 | 1,123 | 1,227 | 1,269 | 1,366 | 1,500 | 1,691 | 1,961 | 3,099 |
| 36 | El Sharara          | 0,051  | 0,043  | 0,050  | 0,050  | 0,050  | 0,050  | 0,049  | 0,051  | 0,052 | 0,050 | 0,055 | 0,067 | 0,082 | 0,111 | 0,171 | 0,208 | 0,203 | 0,210 | 0,233 | 0,252 | 0,284 | 0,260 | 0,405 |
| 37 | Helm                | 0,128  | 0,051  | 0,053  | 0,066  | 0,072  | 0,088  | 0,110  | 0,159  | 0,207 | 0,252 | 0,319 | 0,460 | 0,644 | 0,655 | 0,848 | 1,145 | 1,354 | 1,387 | 1,412 | 1,518 | 1,730 | 1,916 | 3,013 |

Table S5 SARA (Saturates, Aromatics, resins, asphaltenes) of 308 samples of extra light, light, medium, heavy, and extra heavy crude oils

| Nr | Designation       | SG     | Saturates,wt.% | Aromatics, Resins, Asphaltenes, Aromatic structures, |       |       |       | Weight balance, wt. % | SARA method           |
|----|-------------------|--------|----------------|------------------------------------------------------|-------|-------|-------|-----------------------|-----------------------|
|    |                   |        |                | wt. %                                                | wt. % | wt. % | wt. % |                       |                       |
| 1  | A [118]           | 0,8818 | 51,5           | 21,7                                                 | 25,9  | 0,9   | 48,5  | 100                   | Liquid chromatography |
| 2  | C [118]           | 0,8839 | 51,1           | 23,8                                                 | 23    | 2,1   | 48,9  | 100                   | Liquid chromatography |
| 3  | D [118]           | 1,0133 | 27,2           | 26,7                                                 | 32    | 14,1  | 72,8  | 100                   | Liquid chromatography |
| 4  | A [119]           | 0,8612 | 51,62          | 31,35                                                | 14,25 | 2,78  | 48,38 | 100                   | ASTM D2007            |
| 5  | B [119]           | 0,8922 | 43,15          | 29,95                                                | 18,2  | 8,7   | 56,85 | 100                   | ASTM D2007            |
| 6  | C [119]           | 0,8697 | 32,1           | 26,34                                                | 25,82 | 15,74 | 67,9  | 100                   | ASTM D2007            |
| 7  | D [119]           | 0,9786 | 25,38          | 17,04                                                | 31,41 | 26,17 | 74,62 | 100                   | ASTM D2007            |
| 8  | E [119]           | 0,9979 | 20,01          | 11,36                                                | 36,26 | 32,37 | 79,99 | 100                   | ASTM D2007            |
| 9  | West Africa [120] | 0,9140 | 47,9           | 36,5                                                 | 15,2  | 0,4   | 52,1  | 100                   | HPLC                  |
| 10 | North Sea [120]   | 0,9160 | 48             | 37,5                                                 | 14,2  | 0,3   | 52    | 100                   | HPLC                  |
| 11 | West Africa [120] | 0,9160 | 41,2           | 36,4                                                 | 20,4  | 2,1   | 58,9  | 100,1                 | HPLC                  |
| 12 | North Sea [120]   | 0,8390 | 82,7           | 13,4                                                 | 3,9   | 0     | 17,3  | 100                   | HPLC                  |
| 13 | North Sea [120]   | 0,8440 | 62,7           | 23,6                                                 | 12,2  | 1,5   | 37,3  | 100                   | HPLC                  |
| 14 | North Sea [120]   | 0,9450 | 35,3           | 36,8                                                 | 24,5  | 3,5   | 64,8  | 100,1                 | HPLC                  |
| 15 | North Sea [120]   | 0,9140 | 41,8           | 38,8                                                 | 18,7  | 0,6   | 58,1  | 99,9                  | HPLC                  |
| 16 | North Sea [120]   | 0,8850 | 50,9           | 34,6                                                 | 14    | 0,5   | 49,1  | 100                   | HPLC                  |
| 17 | West Africa [120] | 0,8880 | 40,6           | 32,1                                                 | 20,6  | 6,6   | 59,3  | 99,9                  | HPLC                  |
| 18 | North Sea [120]   | 0,7960 | 79,8           | 16,5                                                 | 3,6   | 0,1   | 20,2  | 100                   | HPLC                  |
| 19 | West Africa [120] | 0,8730 | 57,3           | 27,9                                                 | 13,5  | 1,3   | 42,7  | 100                   | HPLC                  |
| 20 | North Sea [120]   | 0,8570 | 60,6           | 30                                                   | 9,2   | 0,2   | 39,4  | 100                   | HPLC                  |
| 21 | West Africa [120] | 0,9210 | 42,4           | 36,1                                                 | 20,5  | 1     | 57,6  | 100                   | HPLC                  |

|    |                   |        |      |      |      |      |      |       |                        |
|----|-------------------|--------|------|------|------|------|------|-------|------------------------|
| 22 | North Sea [120]   | 0,7960 | 65   | 30,7 | 4,3  | 0    | 35   | 100   | HPLC                   |
| 23 | North Sea [120]   | 0,8980 | 50,3 | 31,4 | 17,5 | 0,7  | 49,6 | 99,9  | HPLC                   |
| 24 | North Sea [120]   | 0,8400 | 55,4 | 28,3 | 12,9 | 3,4  | 44,6 | 100   | HPLC                   |
| 25 | West Africa [120] | 0,8730 | 54,5 | 28,8 | 14,9 | 1,8  | 45,5 | 100   | HPLC                   |
| 26 | France [120]      | 0,9390 | 24,4 | 43,4 | 19,9 | 12,4 | 75,7 | 100,1 | HPLC                   |
| 27 | 1 [121]           | 0,9799 | 19,3 | 37,2 | 28,5 | 15,3 | 81   | 100,3 | modified ASTM<br>D4124 |
| 28 | 2 [121]           | 0,9509 | 37,4 | 27,6 | 32,3 | 2,2  | 62,1 | 99,5  | modified ASTM<br>D4124 |
| 29 | 3 [121]           | 0,9334 | 29,8 | 38,4 | 25   | 13,1 | 76,5 | 106,3 | modified ASTM<br>D4124 |
| 30 | 4 [121]           | 0,9291 | 35,2 | 29   | 22,9 | 12   | 63,9 | 99,1  | modified ASTM<br>D4124 |
| 31 | 5 [121]           | 0,8860 | 58,3 | 21,6 | 19,4 | 2,6  | 43,6 | 101,9 | modified ASTM<br>D4124 |
| 32 | 6 [121]           | 0,8844 | 42,9 | 26,9 | 19,6 | 8,9  | 55,4 | 98,3  | modified ASTM<br>D4124 |
| 33 | 7 [121]           | 0,8639 | 51,5 | 24,1 | 21,4 | 2,6  | 48,1 | 99,6  | modified ASTM<br>D4124 |
| 34 | 8 [121]           | 0,8576 | 50,7 | 27,2 | 15,2 | 7,4  | 49,8 | 100,5 | modified ASTM<br>D4124 |
| 35 | 9 [121]           | 0,8555 | 52,7 | 23,3 | 21,9 | 1    | 46,2 | 98,9  | modified ASTM<br>D4124 |
| 36 | 10 [121]          | 0,8529 | 50,4 | 24,9 | 22,1 | 0,8  | 47,8 | 98,2  | modified ASTM<br>D4124 |
| 37 | 11 [121]          | 0,8498 | 46,4 | 29,8 | 18,9 | 4,4  | 53,1 | 99,5  | modified ASTM<br>D4124 |
| 38 | 12 [121]          | 0,8299 | 55,3 | 33,9 | 12,4 | 0,9  | 47,2 | 102,5 | modified ASTM<br>D4124 |

|    |                               |        |       |       |       |       |       |       |                          |
|----|-------------------------------|--------|-------|-------|-------|-------|-------|-------|--------------------------|
| 39 | 13 [121]                      | 0,8241 | 73,2  | 19,4  | 6,5   | 0,1   | 26    | 99,2  | modified ASTM<br>D4124   |
| 40 | 14 [121]                      | 0,8198 | 63,9  | 22,9  | 9,6   | 0,5   | 33    | 96,9  | modified ASTM<br>D4124   |
| 41 | 15 [121]                      | 0,8022 | 64,2  | 17,2  | 15,1  | 0,8   | 33,1  | 97,3  | modified ASTM<br>D4124   |
| 42 | A-95 [122]                    | 0,8956 | 46,2  | 19,7  | 18,6  | 8,8   | 47,1  | 93,3  | ASTM D2007               |
| 43 | CLH-99 [122]                  | 0,9161 | 38,8  | 23,6  | 23,9  | 3,4   | 50,9  | 89,7  | ASTM D2007               |
| 44 | C-R-00 [122]                  | 0,8673 | 68,7  | 17,4  | 9,9   | 1,6   | 28,9  | 97,6  | ASTM D2007               |
| 45 | S-Ven-39 [122]                | 0,8795 | 45,6  | 27,8  | 14,2  | 6,1   | 48,1  | 93,7  | ASTM D2007               |
| 46 | SQ-95 [122]                   | 0,8409 | 47    | 19,4  | 14,7  | 2,6   | 36,7  | 83,7  | ASTM D2007               |
| 47 | Tensleep-99 [122]             | 0,8685 | 59    | 22,9  | 11,7  | 3,2   | 37,8  | 96,8  | ASTM D2007               |
| 48 | A [123]                       | 0,7932 | 86,62 | 8,6   | 3,15  | 0,12  | 11,87 | 98,49 | HPLC                     |
| 49 | B [123]                       | 0,7872 | 80,55 | 14,68 | 3,64  | 0,15  | 18,47 | 99,02 | HPLC                     |
| 50 | C [123]                       | 0,8719 | 71,22 | 23,76 | 3,92  | 0,07  | 27,75 | 98,97 | HPLC                     |
| 51 | D [123]                       | 0,8310 | 78,79 | 15,37 | 4,18  | 0,22  | 19,77 | 98,56 | HPLC                     |
| 52 | Indonesian oil sand<br>[124]  | 1,0300 | 14,05 | 38,23 | 24,51 | 23,21 | 85,95 | 100   | Liquid<br>chromatography |
| 53 | Venezuelan heavy oil<br>[125] | 1,077  | 11,4  | 37,2  | 37,3  | 14,1  | 88,6  | 100   | Liquid<br>chromatography |
| 54 | Oil sand [126]                | 1,0100 | 18,7  | 34,6  | 11,1  | 35,6  | 81,3  | 100   | Liquid<br>chromatography |
| 55 | Athabasca [127]               | 1,0231 | 16,3  | 39,8  | 28,5  | 14,7  | 83    | 99,3  | ASTM D2007               |
| 56 | Cold lake[127]                | 1,0019 | 19,4  | 38,1  | 26,7  | 15,5  | 80,3  | 99,7  | ASTM D2007               |
| 57 | Lloydminster [127]            | 0,9968 | 23,1  | 41,7  | 19,5  | 15,3  | 76,5  | 99,6  | ASTM D2007               |
| 58 | Venezuela No1 [127]           | 1,0178 | 15,4  | 44,4  | 25    | 15,2  | 84,6  | 100   | ASTM D2007               |
| 59 | Venezuela No2 [127]           | 1,0167 | 20,5  | 38    | 19,6  | 21,8  | 79,4  | 99,9  | ASTM D2007               |
| 60 | Russia [127]                  | 0,982  | 25    | 31,1  | 37,1  | 6,8   | 75    | 100   | ASTM D2007               |
| 61 | Indonesia [127]               | 0,963  | 23,2  | 33,9  | 38,2  | 4,7   | 76,8  | 100   | ASTM D2007               |



|    |            |        |      |      |      |     |      |       |                       |
|----|------------|--------|------|------|------|-----|------|-------|-----------------------|
| 62 | PO1 [128]  | 0,9387 | 48,2 | 35,2 | 16   | 0,6 | 51,8 | 100   | Liquid chromatography |
| 63 | PO2 [128]  | 0,9506 | 44,8 | 31,3 | 21,6 | 2,3 | 55,2 | 100   | Liquid chromatography |
| 64 | PO3 [128]  | 0,8986 | 55,3 | 26,4 | 16,5 | 1,8 | 44,7 | 100   | Liquid chromatography |
| 65 | PO4 [128]  | 0,9740 | 35,7 | 24,6 | 32,4 | 7,3 | 64,3 | 100   | Liquid chromatography |
| 66 | PO5 [128]  | 0,9331 | 41,3 | 32,9 | 22,9 | 2,9 | 58,7 | 100   | Liquid chromatography |
| 67 | PO6 [128]  | 0,9017 | 57,2 | 26,9 | 12,9 | 3,1 | 42,9 | 100,1 | Liquid chromatography |
| 68 | PO7 [128]  | 0,7822 | 84,3 | 11   | 4,7  | 0   | 15,7 | 100   | Liquid chromatography |
| 69 | PO8 [128]  | 0,9016 | 57,8 | 21,6 | 20,2 | 0   | 41,8 | 99,6  | Liquid chromatography |
| 70 | PO9 [128]  | 0,8708 | 67,7 | 18,1 | 12,8 | 1,4 | 32,3 | 100   | Liquid chromatography |
| 71 | PO10 [128] | 0,8560 | 58,5 | 29,2 | 10,6 | 1,7 | 41,5 | 100   | Liquid chromatography |
| 72 | PO11 [128] | 0,9328 | 44,2 | 28,8 | 18,3 | 8,8 | 55,9 | 100,1 | Liquid chromatography |
| 73 | PO12 [128] | 0,7967 | 88,3 | 7,1  | 4,5  | 0   | 11,6 | 99,9  | Liquid chromatography |
| 74 | PO13 [128] | 0,9001 | 45,2 | 28,1 | 23,1 | 3,5 | 54,7 | 99,9  | Liquid chromatography |
| 75 | PO14 [128] | 0,9759 | 36,8 | 30   | 27   | 6,2 | 63,2 | 100   | Liquid chromatography |

|    |            |        |      |      |      |      |      |       |                       |
|----|------------|--------|------|------|------|------|------|-------|-----------------------|
| 76 | PO15 [128] | 0,8267 | 87,9 | 5,8  | 6,2  | 0    | 12   | 99,9  | Liquid chromatography |
| 77 | PO16 [128] | 0,9453 | 45,1 | 35   | 18,2 | 1,7  | 54,9 | 100   | Liquid chromatography |
| 78 | PO17 [128] | 0,8223 | 75,4 | 17,7 | 6,9  | 0    | 24,6 | 100   | Liquid chromatography |
| 79 | PO18 [128] | 0,9174 | 54,2 | 25,6 | 19,6 | 0,6  | 45,8 | 100   | Liquid chromatography |
| 80 | PO19 [128] | 0,8108 | 79,6 | 12,8 | 7,1  | 0    | 19,9 | 99,5  | Liquid chromatography |
| 81 | PO20 [128] | 0,8237 | 80,8 | 12,4 | 6,8  | 0    | 19,2 | 100   | Liquid chromatography |
| 82 | PO21 [128] | 0,8996 | 48,3 | 31   | 18,8 | 1,9  | 51,7 | 100   | Liquid chromatography |
| 83 | PO22 [128] | 0,9889 | 39,5 | 27,5 | 21,9 | 11,1 | 60,5 | 100   | Liquid chromatography |
| 84 | PO23 [128] | 0,8247 | 87   | 7,6  | 5,4  | 0    | 13   | 100   | Liquid chromatography |
| 85 | PO24 [128] | 0,8855 | 71,3 | 18,3 | 10,4 | 0    | 28,7 | 100   | Liquid chromatography |
| 86 | PO25 [128] | 0,8168 | 80,2 | 12,1 | 7,7  | 0    | 19,8 | 100   | Liquid chromatography |
| 87 | PO26 [128] | 0,8802 | 75,5 | 13,7 | 10,8 | 0    | 24,5 | 100   | Liquid chromatography |
| 88 | PO27 [128] | 0,9690 | 47,8 | 27,9 | 23,3 | 1    | 52,2 | 100   | Liquid chromatography |
| 89 | PO28 [128] | 0,9459 | 39,6 | 31,5 | 20,8 | 8,2  | 60,5 | 100,1 | Liquid chromatography |

|     |                |        |       |       |      |      |       |       |                       |
|-----|----------------|--------|-------|-------|------|------|-------|-------|-----------------------|
| 90  | PO29 [128]     | 0,9379 | 42,6  | 47,5  | 6,7  | 3,2  | 57,4  | 100   | Liquid chromatography |
| 91  | W1-1 [129]     | 0,7960 | 87,93 | 8,73  | 2,52 | 0,82 | 12,07 | 100   | Liquid chromatography |
| 92  | W1-2 [129]     | 0,7970 | 87,79 | 10,39 | 1,27 | 0,55 | 12,21 | 100   | Liquid chromatography |
| 93  | W1-3 [129]     | 0,8008 | 84,56 | 13,03 | 1,43 | 0,7  | 15,16 | 99,72 | Liquid chromatography |
| 94  | W1-10 [129]    | 0,8004 | 81,44 | 9,68  | 1,82 | 1,03 | 12,53 | 93,97 | Liquid chromatography |
| 95  | W1-11 [129]    | 0,7988 | 84,55 | 11,04 | 1,02 | 0,5  | 12,56 | 97,11 | Liquid chromatography |
| 96  | Alaska [130]   | 0,9970 | 23    | 22    | 35   | 18   | 75    | 98    | Liquid chromatography |
| 97  | Canada 1 [46]  | 1,0140 | 18    | 33    | 30   | 20   | 83    | 101   | Liquid chromatography |
| 98  | Canada 2 [46]  | 0,9910 | 18    | 27    | 27   | 15   | 69,0  | 87    | Liquid chromatography |
| 99  | Canada 3 [46]  | 1,0030 | 15    | 23    | 19   | 10   | 52    | 67    | Liquid chromatography |
| 100 | Texas [46]     | 1,1190 | 4     | 17    | 37   | 43   | 97    | 101   | Liquid chromatography |
| 101 | Utah [46]      | 1,0000 | 19    | 14    | 46   | 20   | 80    | 99    | Liquid chromatography |
| 102 | Venezuela [46] | 1,0130 | 19    | 32    | 29   | 18   | 79    | 98    | Liquid chromatography |
| 103 | [131]          | 0,847  | 71,0  | 26,9  | 2,1  | 0,1  | 29,1  | 100   | ASTM D2007            |
| 104 | [131]          | 0,844  | 79,5  | 19,6  | 0,3  | 0,7  | 20,6  | 100   | ASTM D2007            |
| 105 | [131]          | 0,872  | 68,3  | 29,4  | 1,8  | 0,5  | 31,7  | 100   | ASTM D2007            |

|     |       |       |      |      |     |     |      |        |            |
|-----|-------|-------|------|------|-----|-----|------|--------|------------|
| 106 | [131] | 0,857 | 67,3 | 31,8 | 0,3 | 0,6 | 32,7 | 100    | ASTM D2007 |
| 107 | [131] | 0,838 | 82,0 | 17,9 | 0,0 | 0,1 | 18,0 | 100    | ASTM D2007 |
| 108 | [131] | 0,825 | 70,3 | 29,1 | 0,3 | 0,3 | 29,8 | 100    | ASTM D2007 |
| 109 | [131] | 0,859 | 85,7 | 14,2 | 0,0 | 1,0 | 15,1 | 100,8  | ASTM D2007 |
| 110 | [131] | 0,857 | 76,2 | 22,3 | 1,1 | 0,4 | 23,8 | 100    | ASTM D2007 |
| 111 | [131] | 0,860 | 71,3 | 27,0 | 0,8 | 0,9 | 28,7 | 100    | ASTM D2007 |
| 112 | [131] | 0,876 | 65,2 | 32,3 | 2,5 | 0,0 | 34,8 | 100    | ASTM D2007 |
| 113 | [131] | 0,883 | 66,5 | 30,0 | 3,3 | 0,2 | 33,5 | 100    | ASTM D2007 |
| 114 | [131] | 0,836 | 80,9 | 18,8 | 0,3 | 0,0 | 19,1 | 100    | ASTM D2007 |
| 115 | [131] | 0,832 | 73,1 | 25,1 | 1,5 | 0,3 | 26,9 | 100    | ASTM D2007 |
| 116 | [131] | 0,877 | 59,1 | 33,7 | 6,8 | 0,4 | 40,9 | 100    | ASTM D2007 |
| 117 | [131] | 0,862 | 67,6 | 27,9 | 3,4 | 1,1 | 32,4 | 100    | ASTM D2007 |
| 118 | [131] | 0,881 | 60,0 | 33,2 | 4,7 | 2,2 | 40,0 | 100    | ASTM D2007 |
| 119 | [131] | 0,879 | 61,6 | 38,4 | 0,0 | 2,5 | 41,0 | 102,54 | ASTM D2007 |
| 120 | [131] | 0,816 | 76,0 | 23,0 | 0,7 | 0,3 | 24,0 | 100    | ASTM D2007 |
| 121 | [131] | 0,875 | 83,6 | 16,2 | 0,0 | 1,5 | 17,7 | 101,24 | ASTM D2007 |
| 122 | [131] | 0,846 | 71,5 | 28,2 | 0,3 | 0,0 | 28,5 | 100    | ASTM D2007 |
| 123 | [131] | 0,875 | 67,0 | 30,7 | 0,5 | 1,8 | 33,0 | 100    | ASTM D2007 |
| 124 | [131] | 0,856 | 68,9 | 28,5 | 0,6 | 2,1 | 31,1 | 100    | ASTM D2007 |
| 125 | [131] | 0,886 | 63,7 | 31,9 | 4,4 | 0,1 | 36,3 | 100    | ASTM D2007 |
| 126 | [131] | 0,859 | 72,1 | 25,9 | 0,0 | 2,0 | 27,9 | 100    | ASTM D2007 |
| 127 | [131] | 0,849 | 64,9 | 31,8 | 2,7 | 0,7 | 35,2 | 100    | ASTM D2007 |
| 128 | [131] | 0,879 | 65,2 | 31,0 | 2,6 | 1,3 | 34,8 | 100    | ASTM D2007 |
| 129 | [131] | 0,862 | 63,5 | 29,5 | 5,0 | 2,0 | 36,5 | 100    | ASTM D2007 |
| 130 | [131] | 0,886 | 63,6 | 31,9 | 4,1 | 0,4 | 36,4 | 100    | ASTM D2007 |
| 131 | [131] | 0,803 | 77,6 | 22,6 | 0,0 | 0,4 | 23,0 | 100,6  | ASTM D2007 |
| 132 | [131] | 0,816 | 77,0 | 22,6 | 0,3 | 0,1 | 23,0 | 100    | ASTM D2007 |
| 133 | [131] | 0,856 | 75,6 | 24,0 | 0,0 | 0,6 | 24,6 | 100,2  | ASTM D2007 |

|     |       |       |      |      |     |     |      |        |            |
|-----|-------|-------|------|------|-----|-----|------|--------|------------|
| 134 | [131] | 0,847 | 65,0 | 33,8 | 0,8 | 0,5 | 35,0 | 100    | ASTM D2007 |
| 135 | [131] | 0,794 | 79,2 | 20,5 | 0,3 | 0,0 | 20,8 | 100    | ASTM D2007 |
| 136 | [131] | 0,873 | 68,7 | 27,9 | 3,2 | 0,2 | 31,3 | 100    | ASTM D2007 |
| 137 | [131] | 0,844 | 72,0 | 26,5 | 1,4 | 0,1 | 28,0 | 100    | ASTM D2007 |
| 138 | [131] | 0,863 | 72,9 | 25,7 | 0,7 | 0,7 | 27,1 | 100    | ASTM D2007 |
| 139 | [131] | 0,838 | 82,5 | 16,2 | 0,6 | 0,7 | 17,5 | 100    | ASTM D2007 |
| 140 | [131] | 0,860 | 70,9 | 27,4 | 1,2 | 0,6 | 29,2 | 100    | ASTM D2007 |
| 141 | [131] | 0,864 | 65,8 | 31,7 | 0,9 | 1,6 | 34,2 | 100    | ASTM D2007 |
| 142 | [131] | 0,878 | 72,0 | 27,7 | 0,0 | 3,1 | 30,7 | 102,8  | ASTM D2007 |
| 143 | [131] | 0,836 | 72,9 | 25,5 | 1,1 | 0,5 | 27,1 | 100    | ASTM D2007 |
| 144 | [131] | 0,858 | 74,0 | 24,6 | 0,8 | 0,6 | 26,0 | 100    | ASTM D2007 |
| 145 | [131] | 0,864 | 63,2 | 33,9 |     | 4,9 | 38,7 | 101,96 | ASTM D2007 |
| 146 | [131] | 0,853 | 71,1 | 27,3 | 1,0 | 0,6 | 28,9 | 100    | ASTM D2007 |
| 147 | [131] | 0,862 | 77,7 | 20,0 | 2,1 | 0,2 | 22,3 | 100    | ASTM D2007 |
| 148 | [131] | 0,866 | 67,6 | 32,2 | 0,0 | 1,7 | 33,9 | 101,5  | ASTM D2007 |
| 149 | [131] | 0,820 | 76,5 | 23,8 | 0,0 | 0,0 | 23,9 | 100,4  | ASTM D2007 |
| 150 | [131] | 0,849 | 76,9 | 21,9 | 1,1 | 0,0 | 23,1 | 100    | ASTM D2007 |
| 151 | [131] | 0,822 | 82,5 | 17,5 | 0,0 | 0,1 | 17,6 | 100,1  | ASTM D2007 |
| 152 | [131] | 0,872 | 68,3 | 30,6 | 0,0 | 1,3 | 31,9 | 100,2  | ASTM D2007 |
| 153 | [131] | 0,841 | 74,0 | 24,7 | 0,8 | 0,5 | 26,1 | 100    | ASTM D2007 |
| 154 | [131] | 0,847 | 77,5 | 21,3 | 0,0 | 1,1 | 22,5 | 100    | ASTM D2007 |
| 155 | [131] | 0,834 | 66,5 | 28,8 | 4,1 | 0,5 | 33,5 | 100    | ASTM D2007 |
| 156 | [131] | 0,840 | 71,4 | 27,9 | 0,3 | 0,5 | 28,6 | 100    | ASTM D2007 |
| 157 | [131] | 0,847 | 67,1 | 32,5 | 0,5 | 0,0 | 32,9 | 100    | ASTM D2007 |
| 158 | [131] | 0,859 | 65,2 | 29,6 | 2,7 | 2,6 | 34,8 | 100    | ASTM D2007 |
| 159 | [131] | 0,879 | 60,2 | 33,1 | 4,5 | 2,3 | 39,8 | 100    | ASTM D2007 |
| 160 | [131] | 0,867 | 82,3 | 13,6 | 3,8 | 0,3 | 17,7 | 100    | ASTM D2007 |
| 161 | [131] | 0,847 | 88,9 | 11,0 | 0,1 | 0,0 | 11,1 | 100    | ASTM D2007 |
| 162 | [131] | 0,862 | 63,7 | 30,9 | 5,0 | 0,4 | 36,3 | 100    | ASTM D2007 |

|     |       |       |      |      |      |     |      |       |                     |
|-----|-------|-------|------|------|------|-----|------|-------|---------------------|
| 163 | [131] | 0,858 | 65,1 | 29,7 | 3,0  | 2,2 | 34,9 | 100   | ASTM D2007          |
| 164 | [131] | 0,863 | 64,6 | 30,0 | 3,7  | 1,8 | 35,4 | 100   | ASTM D2007          |
| 165 | [131] | 0,873 | 69,5 | 30,2 | 0,0  | 0,9 | 31,2 | 100,6 | ASTM D2007          |
| 166 | [131] | 0,814 | 76,4 | 24,0 | 0,0  | 0,9 | 24,9 | 101,4 | ASTM D2007          |
| 167 | [131] | 0,814 | 77,2 | 23,1 | 0,0  | 0,1 | 23,2 | 100,3 | ASTM D2007          |
| 168 | [131] | 0,877 | 63,7 | 32,8 | 1,8  | 1,7 | 36,3 | 100   | ASTM D2007          |
| 169 | [131] | 0,826 | 74,8 | 23,8 | 1,0  | 0,4 | 25,3 | 100   | ASTM D2007          |
| 170 | [131] | 0,849 | 78,1 | 21,8 | 0,1  | 0,0 | 21,9 | 100   | ASTM D2007          |
| 171 | [131] | 0,843 | 74,8 | 24,8 | 0,1  | 0,4 | 25,3 | 100   | ASTM D2007          |
| 172 | [131] | 0,799 | 78,7 | 21,1 | 0,2  | 0,0 | 21,3 | 100   | ASTM D2007          |
| 173 | [131] | 0,823 | 77,6 | 21,7 | 0,7  | 0,0 | 22,5 | 100   | ASTM D2007          |
| 174 | [131] | 0,876 | 64,2 | 35,8 | 0,0  | 1,9 | 37,6 | 102   | ASTM D2007          |
| 175 | [131] | 0,851 | 71,1 | 27,9 | 1,0  | 0,0 | 29,0 | 100   | ASTM D2007          |
| 176 | [131] | 0,878 | 52,0 | 48,0 | 0,0  | 2,0 | 50,0 | 102,0 | ASTM D2007          |
| 177 | [131] | 0,817 | 74,6 | 26,3 | 0,0  | 0,0 | 26,3 | 101   | ASTM D2007          |
| 178 | [131] | 0,853 | 69,9 | 30,0 | 0,0  | 0,3 | 30,3 | 100   | ASTM D2007          |
| 179 | [131] | 0,817 | 77,6 | 22,5 | 0,0  | 0,1 | 22,6 | 100   | ASTM D2007          |
| 180 | [131] | 0,826 | 77,1 | 23,2 | 0,0  | 0,1 | 23,3 | 100   | ASTM D2007          |
| 181 | [131] | 0,853 | 72,3 | 26,2 | 0,9  | 0,6 | 27,7 | 100   | ASTM D2007          |
| 182 | [131] | 0,809 | 83,3 | 16,2 | 0,5  | 0,1 | 16,8 | 100   | ASTM D2007          |
| 183 | [131] | 0,845 | 72,6 | 25,5 | 1,3  | 0,6 | 27,4 | 100   | ASTM D2007          |
| 184 | [131] | 0,827 | 70,2 | 25,3 | 4,3  | 0,2 | 29,8 | 100   | ASTM D2007          |
| 185 | [131] | 0,870 | 77,8 | 21,6 | 0,4  | 0,2 | 22,2 | 100   | ASTM D2007          |
| 186 | [131] | 0,858 | 69,3 | 28,1 | 1,8  | 0,8 | 30,7 | 100   | ASTM D2007          |
| 187 | [131] | 0,843 | 73,1 | 25,6 | 0,8  | 0,6 | 26,9 | 100   | ASTM D2007          |
| 188 | [131] | 0,910 | 17,8 | 58,1 | 19,9 | 4,3 | 82,3 | 100,1 | TLC–FID (Iatroscan) |
| 189 | [131] | 0,940 | 23,7 | 43,7 | 24,9 | 7,8 | 76,4 | 100,1 | TLC–FID (Iatroscan) |
| 190 | [131] | 0,900 | 18,5 | 57,2 | 21,1 | 3,2 | 81,5 | 100   | TLC–FID (Iatroscan) |
| 191 | [131] | 0,920 | 20,2 | 56,6 | 19,5 | 3,7 | 79,8 | 100   | TLC–FID (Iatroscan) |

|     |                                                                 |       |      |      |      |      |      |       |                          |
|-----|-----------------------------------------------------------------|-------|------|------|------|------|------|-------|--------------------------|
| 192 | [131]                                                           | 0,930 | 16,4 | 46   | 30,1 | 7,4  | 83,5 | 99,9  | TLC–FID (Iatroscan)      |
| 193 | [131]                                                           | 0,900 | 13,5 | 53,6 | 20,4 | 12,5 | 86,5 | 100   | TLC–FID (Iatroscan)      |
| 194 | [131]                                                           | 0,920 | 15   | 56,4 | 21,6 | 7    | 85,0 | 100   | TLC–FID (Iatroscan)      |
| 195 | [131]                                                           | 0,890 | 23,5 | 51,8 | 19,4 | 5,4  | 76,6 | 100,1 | TLC–FID (Iatroscan)      |
| 196 | [131]                                                           | 0,920 | 15,3 | 39,8 | 31,2 | 13,7 | 84,7 | 100   | TLC–FID (Iatroscan)      |
| 197 | [131]                                                           | 0,920 | 17,1 | 46,6 | 27,8 | 8,4  | 82,8 | 99,9  | TLC–FID (Iatroscan)      |
| 198 | [131]                                                           | 0,880 | 20,5 | 59,6 | 17,8 | 2,1  | 79,5 | 100   | TLC–FID (Iatroscan)      |
| 199 | [131]                                                           | 0,830 | 42,3 | 27,1 | 29,6 | 0,9  | 57,6 | 99,9  | TLC–FID (Iatroscan)      |
| 200 | [131]                                                           | 0,940 | 9,7  | 55,9 | 31,8 | 2,6  | 90,3 | 100   | TLC–FID (Iatroscan)      |
| 201 | [131]                                                           | 0,940 | 56,5 | 17,2 | 26,2 | 0,1  | 43,5 | 100   | TLC–FID (Iatroscan)      |
| 202 | [131]                                                           | 0,860 | 37,1 | 39,1 | 22,7 | 1,1  | 62,9 | 100   | TLC–FID (Iatroscan)      |
| 203 | [131]                                                           | 0,870 | 41,1 | 39   | 16   | 3,8  | 58,8 | 99,9  | TLC–FID (Iatroscan)      |
| 204 | [131]                                                           | 0,830 | 54,9 | 21,2 | 23,8 | 0,2  | 45,2 | 100,1 | TLC–FID (Iatroscan)      |
| 205 | [131]                                                           | 0,900 | 19,9 | 49   | 27,6 | 3,4  | 80,0 | 99,9  | TLC–FID (Iatroscan)      |
| 206 | [131]                                                           | 0,880 | 13,2 | 54,1 | 27,2 | 5,5  | 86,8 | 100   | TLC–FID (Iatroscan)      |
| 207 | [131]                                                           | 0,910 | 39,4 | 28,6 | 28,3 | 3,7  | 60,6 | 100   | TLC–FID (Iatroscan)      |
| 208 | [131]                                                           | 0,870 | 30,3 | 36,4 | 31   | 2,3  | 69,7 | 100   | TLC–FID (Iatroscan)      |
| 209 | [131]                                                           | 0,860 | 7,3  | 59   | 27,7 | 6,1  | 92,8 | 100,1 | TLC–FID (Iatroscan)      |
| 210 | [131]                                                           | 0,900 | 42,7 | 50,6 | 6,6  | 0,2  | 57,4 | 100,1 | TLC–FID (Iatroscan)      |
| 211 | [131]                                                           | 0,850 | 26,6 | 56,4 | 14,5 | 2,6  | 73,5 | 100,1 | TLC–FID (Iatroscan)      |
| 212 | [131]                                                           | 0,880 | 27,1 | 46,2 | 20,2 | 6,4  | 72,8 | 99,9  | TLC–FID (Iatroscan)      |
| 213 | [131]                                                           | 0,840 | 36,2 | 33,5 | 30   | 0,3  | 63,8 | 100   | TLC–FID (Iatroscan)      |
| 214 | [131]                                                           | 0,840 | 51,1 | 27,6 | 0,1  | 21,3 | 49,0 | 100,1 | TLC–FID (Iatroscan)      |
| 215 | Heavy crude [132]<br>Aguacate field, Tierra<br>Blanca Veracruz, | 0,986 | 13,0 | 36,3 | 29,4 | 21,3 | 87,0 | 100   | Liquid<br>chromatography |
| 216 | México [133]                                                    | 0,995 | 10,7 | 3,4  | 62,6 | 23,3 | 89,3 | 100   | ASTM D4124               |

|     |                  |          |       |       |       |      |      |        |      |
|-----|------------------|----------|-------|-------|-------|------|------|--------|------|
| 217 | A-95 [134]       | 0,899024 | 51,01 | 20,49 | 19,7  | 8,84 | 49,0 | 100,04 | HPLC |
| 218 | A-95-99 [134]    | 0,906794 | 59,34 | 18,7  | 13,54 | 8,41 | 40,7 | 99,99  | HPLC |
| 219 | B-1-00 [134]     | 0,839767 | 78,82 | 18,22 | 2,5   | 0,46 | 21,2 | 100    | HPLC |
| 220 | C-A1-00 [134]    | 0,857192 | 68,81 | 12,15 | 16,5  | 2,54 | 31,2 | 100    | HPLC |
| 221 | C-A2-00 [134]    | 0,917554 | 58,06 | 11,91 | 23,41 | 6,62 | 41,9 | 100    | HPLC |
| 222 | C-Ab-01 [134]    | 0,937383 | 60,18 | 16,67 | 20,56 | 2,58 | 39,8 | 99,99  | HPLC |
| 223 | C-B-00 [134]     | 0,842654 | 73,2  | 13,01 | 12,05 | 1,75 | 26,8 | 100,01 | HPLC |
| 224 | C-B2-01 [134]    | 0,841658 | 68,51 | 17,46 | 12,73 | 1,3  | 31,5 | 100    | HPLC |
| 225 | C-GGC-00 [134]   | 0,880895 | 64,87 | 21,65 | 13,18 | 0,31 | 35,1 | 100,01 | HPLC |
| 226 | C-HD-01 [134]    | 0,92971  | 64,12 | 14,47 | 17,89 | 3,53 | 35,9 | 100,01 | HPLC |
| 227 | C-K-01 [134]     | 0,940671 | 52,83 | 19,03 | 24,84 | 3,3  | 47,2 | 100    | HPLC |
| 228 | C-L-01 [134]     | 0,855101 | 66,25 | 16,71 | 13,16 | 3,89 | 33,8 | 100,01 | HPLC |
| 229 | C-LH-99 [134]    | 0,919447 | 49,45 | 21,54 | 25,61 | 3,4  | 50,6 | 100    | HPLC |
| 230 | C-R-00 [134]     | 0,870835 | 70,62 | 16,34 | 11,4  | 1,61 | 29,4 | 99,97  | HPLC |
| 231 | CS [134]         | 0,903706 | 68,23 | 18,4  | 12,86 | 0,52 | 31,8 | 100,01 | HPLC |
| 232 | C-T1-00 [134]    | 0,867051 | 63,44 | 16,46 | 17,43 | 2,67 | 36,6 | 100    | HPLC |
| 233 | C-T2-00 [134]    | 0,86964  | 62,79 | 15,75 | 18,68 | 2,78 | 37,2 | 100    | HPLC |
| 234 | Cymric-28 [134]  | 0,895537 | 54,61 | 23,72 | 19,06 | 2,61 | 45,4 | 100    | HPLC |
| 235 | DS-P-01 [134]    | 0,873325 | 69,68 | 16,72 | 13,03 | 0,57 | 30,3 | 100    | HPLC |
| 236 | E-1XCO-01 [134]  | 0,856793 | 71,49 | 18,05 | 9,73  | 0,74 | 28,5 | 100,01 | HPLC |
| 237 | E-1XD-00 [134]   | 0,919846 | 64,09 | 18,46 | 15,29 | 2,16 | 35,9 | 100    | HPLC |
| 238 | E-1XFR-01 [134]  | 0,826028 | 70,56 | 21,54 | 7,64  | 0,27 | 29,5 | 100,01 | HPLC |
| 239 | E-1XO-00 [134]   | 0,922636 | 57,77 | 22,12 | 19,37 | 0,74 | 42,2 | 100    | HPLC |
| 240 | E-1XR-00 [134]   | 0,881592 | 71,63 | 17,56 | 10,4  | 0,41 | 28,4 | 100    | HPLC |
| 241 | E-1XR-00 [134]   | 0,881592 | 71,63 | 17,56 | 10,4  | 0,41 | 28,4 | 100    | HPLC |
| 242 | E-2XR-00 [134]   | 0,902012 | 65,66 | 18,37 | 14,85 | 1,12 | 34,3 | 100    | HPLC |
| 243 | E-8XFR-01 [134]  | 0,832698 | 70,86 | 19,69 | 9,09  | 0,36 | 29,1 | 100    | HPLC |
| 244 | E-BL-00 [134]    | 0,868644 | 66,34 | 21,17 | 9,45  | 3    | 33,6 | 99,96  | HPLC |
| 245 | E-S1XCA-01 [134] | 0,914864 | 60,69 | 19,07 | 18,27 | 1,96 | 39,3 | 99,99  | HPLC |



|     |                    |          |       |       |       |       |      |        |      |
|-----|--------------------|----------|-------|-------|-------|-------|------|--------|------|
| 246 | E-S1XG-01 [134]    | 0,858984 | 68,71 | 19,82 | 11,03 | 0,43  | 31,3 | 99,99  | HPLC |
| 247 | E-S1XL-01 [134]    | 0,857889 | 71,45 | 19,32 | 8,9   | 0,33  | 28,6 | 100    | HPLC |
| 248 | E-S3XR-01 [134]    | 0,876711 | 68,47 | 16,35 | 14,54 | 0,64  | 31,5 | 100    | HPLC |
| 249 | GOM(1)-00 [134]    | 0,896334 | 54,69 | 20,16 | 20,65 | 4,49  | 45,3 | 99,99  | HPLC |
| 250 | GOM(1)-01 [134]    | 0,905101 | 54,49 | 18,74 | 20,38 | 6,38  | 45,5 | 99,99  | HPLC |
| 251 | GOM(2)-00 [134]    | 0,926123 | 55,6  | 15,41 | 19,07 | 9,92  | 44,4 | 100    | HPLC |
| 252 | Gullfaks-96 [134]  | 0,886174 | 63,34 | 25,49 | 10,93 | 0,24  | 36,7 | 100    | HPLC |
| 253 | Laggrave-97 [134]  | 0,83011  | 64,1  | 18,3  | 10,9  | 6,7   | 35,9 | 100    | HPLC |
| 254 | Mars-97 [134]      | 0,883883 | 57,2  | 22,5  | 17,28 | 3,02  | 42,8 | 100    | HPLC |
| 255 | Mars-P [134]       | 0,95562  | 38,43 | 29,76 | 25,81 | 5,99  | 61,6 | 99,99  | HPLC |
| 256 | Mars-TC [134]      | 0,904104 | 52,31 | 19,84 | 17,94 | 9,91  | 47,7 | 100    | HPLC |
| 257 | Minnelusa [134]    | 0,906396 | 60,06 | 18,93 | 11,27 | 9,74  | 39,9 | 100    | HPLC |
| 258 | Minnelusa-02 [134] | 0,903407 | 57,99 | 20,2  | 13,93 | 7,88  | 42,0 | 100    | HPLC |
| 259 | P-E-00 [134]       | 0,841957 | 72,58 | 18,39 | 8,74  | 0,29  | 27,4 | 100    | HPLC |
| 260 | P-VE-00 [134]      | 0,869441 | 66,76 | 17,18 | 11,58 | 4,49  | 33,3 | 100,01 | HPLC |
| 261 | SQ-95 [134]        | 0,844546 | 65,21 | 18,32 | 13,86 | 2,6   | 34,8 | 99,99  | HPLC |
| 262 | S-Ven-39 [134]     | 0,882986 | 51,09 | 28,3  | 14,51 | 6,06  | 48,9 | 99,96  | HPLC |
| 263 | S-Ven-39 [134]     | 0,882986 | 51,09 | 28,3  | 14,51 | 6,06  | 48,9 | 99,96  | HPLC |
| 264 | S-Ven-40 [134]     | 0,874919 | 64,78 | 17,8  | 11,35 | 6,08  | 35,2 | 100,01 | HPLC |
| 265 | S-Ven-41 [134]     | 0,883684 | 60,03 | 18,31 | 14,48 | 7,17  | 40,0 | 99,99  | HPLC |
| 266 | Tensleep [134]     | 0,871931 | 69,32 | 16,01 | 9,38  | 5,29  | 30,7 | 100    | HPLC |
| 267 | Tensleep-99 [134]  | 0,87203  | 64,02 | 19,84 | 12,9  | 3,24  | 36,0 | 100    | HPLC |
| 268 | Uwyo-CO3 [134]     | 0,828716 | 79,33 | 16,04 | 4,27  | 0,36  | 20,7 | 100    | HPLC |
| 269 | W-CI-01 [134]      | 0,914665 | 54,4  | 21,11 | 20,98 | 3,5   | 45,6 | 99,99  | HPLC |
| 270 | W-Mac-01 [134]     | 0,923732 | 61,1  | 15,69 | 20,04 | 3,17  | 38,9 | 100    | HPLC |
| 271 | W-Mau-01 [134]     | 0,920543 | 50,87 | 20,72 | 18,36 | 10,05 | 49,1 | 100    | HPLC |
| 272 | W-Mi-01 [134]      | 0,839169 | 76,36 | 17,53 | 5,73  | 0,38  | 23,6 | 100    | HPLC |
| 273 | W-Mu*-01 [134]     | 0,831603 | 74,65 | 17,05 | 7,84  | 0,46  | 25,4 | 100    | HPLC |
| 274 | W-PM-01 [134]      | 0,895537 | 59    | 24,43 | 14,2  | 2,37  | 41,0 | 100    | HPLC |

|     |                |          |       |       |       |      |      |        |      |
|-----|----------------|----------|-------|-------|-------|------|------|--------|------|
| 275 | W-Po*-01 [134] | 0,864959 | 67,63 | 19,32 | 12,27 | 0,77 | 32,4 | 99,99  | HPLC |
| 276 | W-PT*-01 [134] | 0,856495 | 64,18 | 22,45 | 12,65 | 0,72 | 35,8 | 100    | HPLC |
| 277 | W-Tr*-01 [134] | 0,843351 | 65,72 | 21,77 | 11,51 | 1    | 34,3 | 100    | HPLC |
| 278 | W-TU*-01 [134] | 0,855101 | 61,94 | 23,52 | 13,38 | 1,17 | 38,1 | 100,01 | HPLC |
| 279 | W-Up-01 [134]  | 0,869142 | 56,47 | 25,17 | 13,96 | 4,4  | 43,5 | 100    | HPLC |
| 280 | W-Ur-01 [134]  | 0,873524 | 55,31 | 24,72 | 17,83 | 2,11 | 44,7 | 99,97  | HPLC |
| 281 | W-Wy*-01 [134] | 0,819458 | 74,1  | 14,68 | 10,67 | 0,55 | 25,9 | 100    | HPLC |
| 282 | [135]          | 0,965089 | 33,1  | 46    | 18,8  | 1,2  | 66,0 | 99,1   | HPLC |
| 283 | [135]          | 0,896354 | 43,5  | 41,1  | 12,6  | 1,9  | 55,6 | 99,1   | HPLC |
| 284 | [135]          | 0,942484 | 30,6  | 43,3  | 20,9  | 5    | 69,2 | 99,8   | HPLC |
| 285 | [135]          | 0,965089 | 35,2  | 30,1  | 22,1  | 3,1  | 55,3 | 90,5   | HPLC |
| 286 | [135]          | 0,871855 | 53    | 36,3  | 9,3   | 1,2  | 46,8 | 99,8   | HPLC |
| 287 | [135]          | 0,990664 | 26    | 38    | 20,5  | 2,8  | 61,3 | 87,3   | HPLC |
| 288 | [135]          | 0,914991 | 46,6  | 37,6  | 14    | 1,7  | 53,3 | 99,9   | HPLC |
| 289 | [135]          | 0,97689  | 34    | 36,8  | 16,4  | 12,6 | 65,8 | 99,8   | HPLC |
| 290 | [135]          | 0,880671 | 51,3  | 37,5  | 9,8   | 1,2  | 48,5 | 99,8   | HPLC |
| 291 | [135]          | 0,929715 | 47,5  | 40,1  | 11,5  | 0,8  | 52,4 | 99,9   | HPLC |
| 292 | [135]          | 0,890471 | 53,6  | 38,3  | 7     | 0,6  | 45,9 | 99,5   | HPLC |
| 293 | [135]          | 0,944448 | 36,5  | 47,4  | 11,6  | 3,9  | 62,9 | 99,4   | HPLC |
| 294 | [135]          | 0,991648 | 31    | 32,6  | 30,9  | 4,3  | 67,8 | 98,8   | HPLC |
| 295 | [135]          | 0,882631 | 57,3  | 33,4  | 8,2   | 1    | 42,6 | 99,9   | HPLC |
| 296 | [135]          | 0,960173 | 35,4  | 41,4  | 18,5  | 4,6  | 64,5 | 99,9   | HPLC |
| 297 | [135]          | 0,939536 | 38,2  | 43,6  | 14,1  | 3,8  | 61,5 | 99,7   | HPLC |
| 298 | [135]          | 0,908123 | 51,1  | 41,1  | 7,4   | 0,3  | 48,8 | 99,9   | HPLC |
| 299 | [135]          | 0,982792 | 26,3  | 41,3  | 21,9  | 10,4 | 73,6 | 99,9   | HPLC |
| 300 | [135]          | 0,869896 | 57,2  | 34    | 8,1   | 0,2  | 42,3 | 99,5   | HPLC |
| 301 | [135]          | 0,928734 | 26,2  | 52,8  | 11,4  | 5,5  | 69,7 | 95,9   | HPLC |
| 302 | [135]          | 0,938554 | 42,9  | 42,1  | 13,9  | 0,6  | 56,6 | 99,5   | HPLC |
| 303 | [135]          | 0,937572 | 40,1  | 41,2  | 15,6  | 2,8  | 59,6 | 99,7   | HPLC |

|     |       |          |           |           |        |             |                                 |                      |      |
|-----|-------|----------|-----------|-----------|--------|-------------|---------------------------------|----------------------|------|
| 304 | [135] | 0,892432 | 57,9      | 34,8      | 6,7    | 0,2         | 41,7                            | 99,6                 | HPLC |
| 305 | [135] | 0,895373 | 56,1      | 37,6      | 6,2    | 0,1         | 43,9                            | 100                  | HPLC |
| 306 | [135] | 0,935608 | 43,8      | 38,4      | 15     | 2,3         | 55,7                            | 99,5                 | HPLC |
| 307 | [135] | 0,858148 | 63,7      | 28,6      | 6,3    | 0,4         | 35,3                            | 99                   | HPLC |
| 308 | [135] | 0,952309 | 39        | 39,2      | 18,4   | 3,4         | 61,0                            | 100                  | HPLC |
| Min |       | 0,7822   | 4         | 3,4       | 0      | 0           | 11,08                           | 67                   |      |
| Max |       | 1,119    | 88,92     | 59,6      | 62,6   | 43          | 97                              | 106,3                |      |
|     |       |          |           |           |        |             | Aromatic<br>structures,<br>wt.% |                      |      |
|     |       | density  | Saturates | Aromatics | Resins | Asphaltenes | wt.%                            | Weight balance, wt.% |      |

Table S6  $\mu$ -values of the Intercriteria analysis evaluation of relations between SARA fractions and specific gravity of the studied crude oils by the ASTM D 2007 method (103 crude oil samples)

| <b>Mu</b>         | SG   | Sat  | Aro  | Res  | Asp  | ARO str. | %Aro in ARO str. | %Res in ARO str. | %Asp. in ARO str. | CII  |
|-------------------|------|------|------|------|------|----------|------------------|------------------|-------------------|------|
| SG                | 1,00 | 0,20 | 0,69 | 0,76 | 0,73 | 0,79     | 0,21             | 0,74             | 0,71              | 0,20 |
| Sat               | 0,20 | 1,00 | 0,19 | 0,16 | 0,21 | 0,01     | 0,83             | 0,20             | 0,25              | 0,96 |
| Aro               | 0,69 | 0,19 | 1,00 | 0,65 | 0,61 | 0,81     | 0,36             | 0,61             | 0,58              | 0,17 |
| Res               | 0,76 | 0,16 | 0,65 | 1,00 | 0,73 | 0,83     | 0,08             | 0,96             | 0,70              | 0,16 |
| Asp               | 0,73 | 0,21 | 0,61 | 0,73 | 1,00 | 0,77     | 0,19             | 0,70             | 0,95              | 0,23 |
| ARO str.          | 0,79 | 0,01 | 0,81 | 0,83 | 0,77 | 1,00     | 0,17             | 0,79             | 0,73              | 0,02 |
| %Aro in ARO str.  | 0,21 | 0,83 | 0,36 | 0,08 | 0,19 | 0,17     | 1,00             | 0,09             | 0,20              | 0,80 |
| %Res in ARO str.  | 0,74 | 0,20 | 0,61 | 0,96 | 0,70 | 0,79     | 0,09             | 1,00             | 0,68              | 0,19 |
| %Asp. in ARO str. | 0,71 | 0,25 | 0,58 | 0,70 | 0,95 | 0,73     | 0,20             | 0,68             | 1,00              | 0,26 |
| CII               | 0,20 | 0,96 | 0,17 | 0,16 | 0,23 | 0,02     | 0,80             | 0,19             | 0,26              | 1,00 |

Table S7  $\nu$ -values of the Intercriteria analysis evaluation of relations between SARA fractions and specific gravity of the studied crude oils by the ASTM D 2007 method (103 crude oil samples)

| <b>Nu</b>         | SG   | Sat  | Aro  | Res  | Asp  | ARO str. | %Aro in ARO str. | %Res in ARO str. | %Asp. in ARO str. | CII  |
|-------------------|------|------|------|------|------|----------|------------------|------------------|-------------------|------|
| SG                | 0,00 | 0,80 | 0,31 | 0,23 | 0,25 | 0,20     | 0,78             | 0,25             | 0,27              | 0,77 |
| Sat               | 0,80 | 0,00 | 0,81 | 0,84 | 0,78 | 0,99     | 0,17             | 0,79             | 0,74              | 0,02 |
| Aro               | 0,31 | 0,81 | 0,00 | 0,35 | 0,38 | 0,19     | 0,63             | 0,39             | 0,41              | 0,80 |
| Res               | 0,23 | 0,84 | 0,35 | 0,00 | 0,26 | 0,17     | 0,91             | 0,04             | 0,28              | 0,82 |
| Asp               | 0,25 | 0,78 | 0,38 | 0,26 | 0,00 | 0,22     | 0,80             | 0,29             | 0,03              | 0,74 |
| ARO str.          | 0,20 | 0,99 | 0,19 | 0,17 | 0,22 | 0,00     | 0,82             | 0,21             | 0,25              | 0,96 |
| %Aro in ARO str.  | 0,78 | 0,17 | 0,63 | 0,91 | 0,80 | 0,82     | 0,00             | 0,90             | 0,78              | 0,17 |
| %Res in ARO str.  | 0,25 | 0,79 | 0,39 | 0,04 | 0,29 | 0,21     | 0,90             | 0,00             | 0,30              | 0,78 |
| %Asp. in ARO str. | 0,27 | 0,74 | 0,41 | 0,28 | 0,03 | 0,25     | 0,78             | 0,30             | 0,00              | 0,70 |
| CII               | 0,77 | 0,02 | 0,80 | 0,82 | 0,74 | 0,96     | 0,17             | 0,78             | 0,70              | 0,00 |

Table S8  $\mu$ -values of the Intercriteria analysis evaluation of relations between SARA fractions and specific gravity of the studied crude oils by the HPLC method (116 crude oil samples)

| <b>Mu</b>         | SG   | Sat  | Aro  | Res  | Asp  | ARO str. | %Aro in ARO str. | %Res in ARO str. | %Asp. in ARO str. | CII  |
|-------------------|------|------|------|------|------|----------|------------------|------------------|-------------------|------|
| SG                | 1,00 | 0,18 | 0,68 | 0,77 | 0,68 | 0,82     | 0,39             | 0,57             | 0,62              | 0,19 |
| Sat               | 0,18 | 1,00 | 0,20 | 0,25 | 0,31 | 0,01     | 0,54             | 0,51             | 0,38              | 0,92 |
| Aro               | 0,68 | 0,20 | 1,00 | 0,56 | 0,52 | 0,80     | 0,66             | 0,32             | 0,45              | 0,15 |
| Res               | 0,77 | 0,25 | 0,56 | 1,00 | 0,74 | 0,75     | 0,25             | 0,74             | 0,70              | 0,25 |
| Asp               | 0,68 | 0,31 | 0,52 | 0,74 | 1,00 | 0,69     | 0,24             | 0,63             | 0,92              | 0,36 |
| ARO str.          | 0,82 | 0,01 | 0,80 | 0,75 | 0,69 | 1,00     | 0,46             | 0,49             | 0,61              | 0,05 |
| %Aro in ARO str.  | 0,39 | 0,54 | 0,66 | 0,25 | 0,24 | 0,46     | 1,00             | 0,13             | 0,21              | 0,48 |
| %Res in ARO str.  | 0,57 | 0,51 | 0,32 | 0,74 | 0,63 | 0,49     | 0,13             | 1,00             | 0,66              | 0,50 |
| %Asp. in ARO str. | 0,62 | 0,38 | 0,45 | 0,70 | 0,92 | 0,61     | 0,21             | 0,66             | 1,00              | 0,43 |
| CII               | 0,19 | 0,92 | 0,15 | 0,25 | 0,36 | 0,05     | 0,48             | 0,50             | 0,43              | 1,00 |

Table S9  $\nu$  -values of the Intercriteria analysis evaluation of relations between SARA fractions and specific gravity of the studied crude oils by the HPLC method (116 crude oil samples)

| <b>Nu</b>         | SG   | Sat  | Aro  | Res  | Asp  | ARO str. | %Aro in ARO str. | %Res in ARO str. | %Asp. in ARO str. | CII  |
|-------------------|------|------|------|------|------|----------|------------------|------------------|-------------------|------|
| SG                | 0,00 | 0,82 | 0,32 | 0,23 | 0,31 | 0,18     | 0,60             | 0,43             | 0,38              | 0,78 |
| Sat               | 0,82 | 0,00 | 0,80 | 0,75 | 0,68 | 0,99     | 0,46             | 0,49             | 0,61              | 0,05 |
| Aro               | 0,32 | 0,80 | 0,00 | 0,43 | 0,48 | 0,20     | 0,33             | 0,68             | 0,55              | 0,81 |
| Res               | 0,23 | 0,75 | 0,43 | 0,00 | 0,26 | 0,25     | 0,75             | 0,26             | 0,30              | 0,71 |
| Asp               | 0,31 | 0,68 | 0,48 | 0,26 | 0,00 | 0,31     | 0,76             | 0,36             | 0,07              | 0,61 |
| ARO str.          | 0,18 | 0,99 | 0,20 | 0,25 | 0,31 | 0,00     | 0,54             | 0,51             | 0,38              | 0,92 |
| %Aro in ARO str.  | 0,60 | 0,46 | 0,33 | 0,75 | 0,76 | 0,54     | 0,00             | 0,87             | 0,79              | 0,49 |
| %Res in ARO str.  | 0,43 | 0,49 | 0,68 | 0,26 | 0,36 | 0,51     | 0,87             | 0,00             | 0,33              | 0,46 |
| %Asp. in ARO str. | 0,38 | 0,61 | 0,55 | 0,30 | 0,07 | 0,38     | 0,79             | 0,33             | 0,00              | 0,53 |
| CII               | 0,78 | 0,05 | 0,81 | 0,71 | 0,61 | 0,92     | 0,49             | 0,46             | 0,53              | 0,00 |

Table S10  $\mu$ -values of the Intercriteria analysis evaluation of relations between SARA fractions and specific gravity of the studied crude oils by the liquid chromatography method (47 crude oil samples)

| <b>Mu</b>         | SG   | Sat  | Aro  | Res  | Asp  | ARO str. | %Aro in ARO str. | %Res in ARO str. | %Asp. in ARO str. | CII  |
|-------------------|------|------|------|------|------|----------|------------------|------------------|-------------------|------|
| SG                | 1,00 | 0,08 | 0,76 | 0,84 | 0,80 | 0,91     | 0,20             | 0,60             | 0,75              | 0,10 |
| Sat               | 0,08 | 1,00 | 0,21 | 0,15 | 0,11 | 0,03     | 0,79             | 0,41             | 0,17              | 0,91 |
| Aro               | 0,76 | 0,21 | 1,00 | 0,68 | 0,69 | 0,80     | 0,40             | 0,46             | 0,63              | 0,18 |
| Res               | 0,84 | 0,15 | 0,68 | 1,00 | 0,74 | 0,86     | 0,14             | 0,73             | 0,69              | 0,13 |
| Asp               | 0,80 | 0,11 | 0,69 | 0,74 | 1,00 | 0,83     | 0,22             | 0,50             | 0,93              | 0,16 |
| ARO str.          | 0,91 | 0,03 | 0,80 | 0,86 | 0,83 | 1,00     | 0,21             | 0,59             | 0,77              | 0,06 |
| %Aro in ARO str.  | 0,20 | 0,79 | 0,40 | 0,14 | 0,22 | 0,21     | 1,00             | 0,23             | 0,25              | 0,74 |
| %Res in ARO str.  | 0,60 | 0,41 | 0,46 | 0,73 | 0,50 | 0,59     | 0,23             | 1,00             | 0,46              | 0,37 |
| %Asp. in ARO str. | 0,75 | 0,17 | 0,63 | 0,69 | 0,93 | 0,77     | 0,25             | 0,46             | 1,00              | 0,22 |
| CII               | 0,10 | 0,91 | 0,18 | 0,13 | 0,16 | 0,06     | 0,74             | 0,37             | 0,22              | 1,00 |

Table S11  $\nu$  -values of the Intercriteria analysis evaluation of relations between SARA fractions and specific gravity of the studied crude oils by the liquid chromatography method (47 crude oil samples)

| <b>Nu</b>         | SG   | Sat  | Aro  | Res  | Asp  | ARO str. | %Aro in ARO str. | %Res in ARO str. | %Asp. in ARO str. | CII  |
|-------------------|------|------|------|------|------|----------|------------------|------------------|-------------------|------|
| SG                | 0,00 | 0,91 | 0,24 | 0,16 | 0,14 | 0,09     | 0,80             | 0,40             | 0,20              | 0,86 |
| Sat               | 0,91 | 0,00 | 0,79 | 0,84 | 0,83 | 0,97     | 0,20             | 0,58             | 0,77              | 0,05 |
| Aro               | 0,24 | 0,79 | 0,00 | 0,32 | 0,26 | 0,20     | 0,59             | 0,54             | 0,32              | 0,78 |
| Res               | 0,16 | 0,84 | 0,32 | 0,00 | 0,21 | 0,14     | 0,86             | 0,27             | 0,26              | 0,83 |
| Asp               | 0,14 | 0,83 | 0,26 | 0,21 | 0,00 | 0,12     | 0,73             | 0,45             | 0,06              | 0,75 |
| ARO str.          | 0,09 | 0,97 | 0,20 | 0,14 | 0,12 | 0,00     | 0,79             | 0,41             | 0,18              | 0,90 |
| %Aro in ARO str.  | 0,80 | 0,20 | 0,59 | 0,86 | 0,73 | 0,79     | 0,00             | 0,77             | 0,69              | 0,22 |
| %Res in ARO str.  | 0,40 | 0,58 | 0,54 | 0,27 | 0,45 | 0,41     | 0,77             | 0,00             | 0,48              | 0,59 |
| %Asp. in ARO str. | 0,20 | 0,77 | 0,32 | 0,26 | 0,06 | 0,18     | 0,69             | 0,48             | 0,00              | 0,69 |
| CII               | 0,86 | 0,05 | 0,78 | 0,83 | 0,75 | 0,90     | 0,22             | 0,59             | 0,69              | 0,00 |

Table S12  $\mu$ -values of the Intercriteria analysis evaluation of relations between SARA fractions and specific gravity of the studied crude oils by the modified ASTM D 4124 method (15 crude oil samples)

| <b>Mu</b>         | SG   | Sat  | Aro  | Res  | Asp  | ARO str. | %Aro in ARO str. | %Res in ARO str. | %Asp. in ARO str. | CII  |
|-------------------|------|------|------|------|------|----------|------------------|------------------|-------------------|------|
| SG                | 1,00 | 0,18 | 0,70 | 0,83 | 0,81 | 0,82     | 0,16             | 0,58             | 0,79              | 0,18 |
| Sat               | 0,18 | 1,00 | 0,15 | 0,16 | 0,13 | 0,04     | 0,73             | 0,45             | 0,18              | 0,90 |
| Aro               | 0,70 | 0,15 | 1,00 | 0,69 | 0,75 | 0,85     | 0,42             | 0,41             | 0,72              | 0,14 |
| Res               | 0,83 | 0,16 | 0,69 | 1,00 | 0,72 | 0,82     | 0,18             | 0,70             | 0,71              | 0,11 |
| Asp               | 0,81 | 0,13 | 0,75 | 0,72 | 1,00 | 0,87     | 0,25             | 0,47             | 0,95              | 0,17 |
| ARO str.          | 0,82 | 0,04 | 0,85 | 0,82 | 0,87 | 1,00     | 0,27             | 0,52             | 0,84              | 0,07 |
| %Aro in ARO str.  | 0,16 | 0,73 | 0,42 | 0,18 | 0,25 | 0,27     | 1,00             | 0,29             | 0,24              | 0,70 |
| %Res in ARO str.  | 0,58 | 0,45 | 0,41 | 0,70 | 0,47 | 0,52     | 0,29             | 1,00             | 0,47              | 0,38 |
| %Asp. in ARO str. | 0,79 | 0,18 | 0,72 | 0,71 | 0,95 | 0,84     | 0,24             | 0,47             | 1,00              | 0,22 |
| CII               | 0,18 | 0,90 | 0,14 | 0,11 | 0,17 | 0,07     | 0,70             | 0,38             | 0,22              | 1,00 |

Table S13  $\nu$  -values of the Intercriteria analysis evaluation of relations between SARA fractions and specific gravity of the studied crude oils by the modified ASTM D 4124 method (15 crude oil samples)

| <b>Nu</b>         | SG   | Sat  | Aro  | Res  | Asp  | ARO str. | %Aro in ARO str. | %Res in ARO str. | %Asp. in ARO str. | CII  |
|-------------------|------|------|------|------|------|----------|------------------|------------------|-------------------|------|
| SG                | 0,00 | 0,82 | 0,30 | 0,17 | 0,17 | 0,18     | 0,84             | 0,41             | 0,21              | 0,76 |
| Sat               | 0,82 | 0,00 | 0,85 | 0,84 | 0,85 | 0,96     | 0,27             | 0,54             | 0,82              | 0,05 |
| Aro               | 0,30 | 0,85 | 0,00 | 0,31 | 0,23 | 0,15     | 0,58             | 0,58             | 0,28              | 0,80 |
| Res               | 0,17 | 0,84 | 0,31 | 0,00 | 0,26 | 0,18     | 0,82             | 0,29             | 0,29              | 0,83 |
| Asp               | 0,17 | 0,85 | 0,23 | 0,26 | 0,00 | 0,11     | 0,73             | 0,52             | 0,03              | 0,75 |
| ARO str.          | 0,18 | 0,96 | 0,15 | 0,18 | 0,11 | 0,00     | 0,73             | 0,47             | 0,16              | 0,88 |
| %Aro in ARO str.  | 0,84 | 0,27 | 0,58 | 0,82 | 0,73 | 0,73     | 0,00             | 0,70             | 0,76              | 0,24 |
| %Res in ARO str.  | 0,41 | 0,54 | 0,58 | 0,29 | 0,52 | 0,47     | 0,70             | 0,00             | 0,52              | 0,55 |
| %Asp. in ARO str. | 0,21 | 0,82 | 0,28 | 0,29 | 0,03 | 0,16     | 0,76             | 0,52             | 0,00              | 0,72 |
| CII               | 0,76 | 0,05 | 0,80 | 0,83 | 0,75 | 0,88     | 0,24             | 0,55             | 0,72              | 0,00 |

Table S14 Correlation matrix of SARA fractions and specific gravity of the studied crude oils by the TLC method (27 crude oil samples)

|                   | <i>SG</i> | <i>Sat</i>  | <i>Aro</i>  | <i>Res</i>  | <i>Asp</i>  | <i>ARO str.</i> | <i>%Aro in ARO str.</i> | <i>%Res in ARO str.</i> | <i>%Asp. in ARO str.</i> | <i>CII</i> |
|-------------------|-----------|-------------|-------------|-------------|-------------|-----------------|-------------------------|-------------------------|--------------------------|------------|
| SG                | 1,00      |             |             |             |             |                 |                         |                         |                          |            |
| Sat               | -0,43     | 1,00        |             |             |             |                 |                         |                         |                          |            |
| Aro               | 0,29      | -0,84       | 1,00        |             |             |                 |                         |                         |                          |            |
| Res               | 0,25      | -0,34       | -0,11       | 1,00        |             |                 |                         |                         |                          |            |
| Asp               | 0,10      | -0,21       | 0,04        | -0,31       | 1,00        |                 |                         |                         |                          |            |
| ARO str.          | 0,43      | -1,00       | <b>0,84</b> | 0,33        | 0,21        | 1,00            |                         |                         |                          |            |
| %Aro in ARO str.  | 0,02      | -0,34       | <b>0,78</b> | -0,58       | -0,12       | 0,34            | 1,00                    |                         |                          |            |
| %Res in ARO str.  | 0,02      | 0,27        | -0,59       | <b>0,79</b> | -0,52       | -0,27           | -0,76                   | 1,00                    |                          |            |
| %Asp. in ARO str. | -0,06     | 0,03        | -0,11       | -0,47       | <b>0,95</b> | -0,02           | -0,12                   | -0,55                   | 1,00                     |            |
| CII               | -0,38     | <b>0,80</b> | -0,71       | -0,54       | 0,35        | <b>-0,80</b>    | -0,33                   | -0,10                   | 0,59                     | 1,00       |
